# Supplementary material
Source: PubMed Central journal article supplement (PMC6870518)
Supplement: HBM-33-778-s001.pdf [file HBM-33-778-s001.pdf]

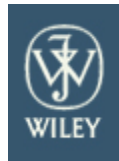

## Identifying the Default Mode component in spatial ICA analyses of patients with disorders of consciousness

|                               |                                                                                                                                                                                                                                                                                                                                                                                                                                                                                                                                                                                                                                                                                                                                                                                                                                                                                                                                                                                                                                                                                                                                                                                                                                                                                                                                                                                                                                                                                                                                                  |
|-------------------------------|--------------------------------------------------------------------------------------------------------------------------------------------------------------------------------------------------------------------------------------------------------------------------------------------------------------------------------------------------------------------------------------------------------------------------------------------------------------------------------------------------------------------------------------------------------------------------------------------------------------------------------------------------------------------------------------------------------------------------------------------------------------------------------------------------------------------------------------------------------------------------------------------------------------------------------------------------------------------------------------------------------------------------------------------------------------------------------------------------------------------------------------------------------------------------------------------------------------------------------------------------------------------------------------------------------------------------------------------------------------------------------------------------------------------------------------------------------------------------------------------------------------------------------------------------|
| Journal:                      | <i>Human Brain Mapping</i>                                                                                                                                                                                                                                                                                                                                                                                                                                                                                                                                                                                                                                                                                                                                                                                                                                                                                                                                                                                                                                                                                                                                                                                                                                                                                                                                                                                                                                                                                                                       |
| Manuscript ID:                | HBM-10-0570.R1                                                                                                                                                                                                                                                                                                                                                                                                                                                                                                                                                                                                                                                                                                                                                                                                                                                                                                                                                                                                                                                                                                                                                                                                                                                                                                                                                                                                                                                                                                                                   |
| Wiley - Manuscript type:      | Research Article                                                                                                                                                                                                                                                                                                                                                                                                                                                                                                                                                                                                                                                                                                                                                                                                                                                                                                                                                                                                                                                                                                                                                                                                                                                                                                                                                                                                                                                                                                                                 |
| Date Submitted by the Author: | 21-Nov-2010                                                                                                                                                                                                                                                                                                                                                                                                                                                                                                                                                                                                                                                                                                                                                                                                                                                                                                                                                                                                                                                                                                                                                                                                                                                                                                                                                                                                                                                                                                                                      |
| Complete List of Authors:     | <p>Soddu, Andrea; Coma Science Group, Cyclotron Research Center, University of Liège, Neurology<br/>         Vanhauzenhuyse, Audrey; Coma Science Group, Cyclotron Research Center, University of Liège, Neurology<br/>         Bahri, Mohamed Ali; Cyclotron Research Center, University of Liège, Neurology<br/>         Bruno, Marie-Aurelie; Coma Science Group, Cyclotron Research Center, University of Liège, Neurology<br/>         Boly, Mélanie; Coma Science Group, Cyclotron Research Center, University of Liège<br/>         Demertzi, Athena; Coma Science Group, Cyclotron Research Center, University of Liège<br/>         Tshibanda, Jean-Flory; Sart Tilman University Hospital, Department of Radiology<br/>         Phillips, Christophe; University of Liège, Cyclotron Research Centre<br/>         Stanziano, Mario; Second University of Naples, Medicina Pubblica Clinica e Preventiva<br/>         Ovadia-Caro, Smadar; Weizmann Institute of Science, Neurobiology<br/>         Nir, Yuval; University of Wisconsin, Psychiatry<br/>         Maquet, Pierre; Cyclotron Research Center, University of Liege, Neurology<br/>         Papa, Michele; Second University of Naples, Medicina Pubblica Clinica e Preventiva<br/>         Malach, Rafael; Weizmann Institute of Science, Neurobiology<br/>         Laureys, Steven; Coma Science Group, Cyclotron Research Center, University of Liège, Neurology<br/>         Noirhomme, Quentin; Coma Science Group, Cyclotron Research Center, University of Liège</p> |
| Keywords:                     | resting state, fMRI, independent component analysis, default mode, vegetative state, locked-in syndrome, consciousness                                                                                                                                                                                                                                                                                                                                                                                                                                                                                                                                                                                                                                                                                                                                                                                                                                                                                                                                                                                                                                                                                                                                                                                                                                                                                                                                                                                                                           |
|                               |                                                                                                                                                                                                                                                                                                                                                                                                                                                                                                                                                                                                                                                                                                                                                                                                                                                                                                                                                                                                                                                                                                                                                                                                                                                                                                                                                                                                                                                                                                                                                  |

1  
2  
3  
4  
5  
6  
7  
8  
9  
10  
11  
12  
13  
14  
15  
16  
17  
18  
19  
20  
21  
22  
23  
24  
25  
26  
27  
28  
29  
30  
31  
32  
33  
34  
35  
36  
37  
38  
39  
40  
41  
42  
43  
44  
45  
46  
47  
48  
49  
50  
51  
52  
53  
54  
55  
56  
57  
58  
59  
60

SCHOLARONE™  
Manuscripts

For Peer Review

1  
2  
3  
4  
5  
6  
7  
8  
9  
10  
11  
12  
13  
14  
15  
16  
17  
18  
19  
20  
21  
22  
23  
24  
25  
26  
27  
28  
29  
30  
31  
32  
33  
34  
35  
36  
37  
38  
39  
40  
41  
42  
43  
44  
45  
46  
47  
48  
49  
50  
51  
52  
53  
54  
55  
56  
57  
58  
59  
60

**Title: Identifying the Default Mode component in spatial ICA analyses of patients with disorders of consciousness**

Soddu A<sup>1</sup>, Vanhaudenhuyse A<sup>1</sup>, Bahri MA<sup>2</sup>, Bruno MA<sup>1</sup>, Boly M<sup>1,3</sup>, Demertzi A<sup>1</sup>, Tshibanda L<sup>3</sup>, Phillips C<sup>2,4</sup>, Stanziano M<sup>5</sup>, Ovadia-Caro S<sup>6</sup>, Nir Y<sup>7</sup>, Maquet P<sup>2,3</sup>, Papa M<sup>5</sup>, Malach R<sup>6</sup>, Laureys S<sup>1,3</sup>, Noirhomme Q<sup>1</sup>.

<sup>1</sup>Coma Science Group, Cyclotron Research Centre, University of Liège, Belgium

<sup>2</sup>Cyclotron Research Centre, University of Liège, Belgium

<sup>3</sup>Neurology Department, CHU Sart Tilman Hospital, University of Liège, Belgium

<sup>4</sup>Department of Electrical Engineering and Computer Science, University of Liège, Belgium

<sup>5</sup>Medicina Pubblica Clinica e Preventiva, Second University of Naples, Naples, Italy

<sup>6</sup>Department of Neurobiology, Weizmann Institute of Science, Rehovot 76100, Israel

<sup>7</sup>Department of Psychiatry, University of Wisconsin, Madison, WI, 53719, USA

**Keywords:** resting state, fMRI, independent component analysis, default mode, vegetative state, locked-in syndrome, consciousness.

**Corresponding author:**

Soddu Andrea

Coma Science Group, Cyclotron Research Center & Neurology Department,

University of Liège, Allée du 6 août n° 8, Sart Tilman B30, 4031 Liège, Belgium

E-mail address: [Andrea.Soddu@ulg.ac.be](mailto:Andrea.Soddu@ulg.ac.be)

Phone number: 0032 4 366 2335 Fax number: 0032 4 366 2946

## Abstract

*Objectives:* Recent fMRI studies have shown that it is possible to reliably identify the Default Mode network in the absence of any task, by resting state connectivity analyses in healthy volunteers. We here aimed to identify the Default Mode network in the challenging patient population of disorders of consciousness encountered following coma. *Experiment design:* **A spatial Independent Component Analysis-based methodology permitted Default Mode network assessment, decomposing connectivity in all its different sources either neuronal or artifactual.** Three different selection criteria were introduced assessing anticorrelation-corrected connectivity with or without an automatic masking procedure and calculating connectivity scores encompassing both spatial and temporal properties. These three methods were validated on 10 healthy controls and applied to an independent group of 8 healthy controls and 11 severely brain damaged patients (locked-in syndrome (n=2), minimally conscious (n=1) and vegetative state (n=8)). *Principal observations:* All vegetative patients showed fewer connections in the default mode areas, as compared to controls, contrary to locked-in patients who showed near-normal connectivity. **In the minimally conscious state patient only the two selection criteria considering both spatial and temporal properties were able to identify an intact right lateralized BOLD connectivity pattern and metabolic PET data suggested its neuronal origin.** *Conclusion:* **When assessing resting state connectivity in patients with disorders of consciousness it is important to employ a methodology excluding non-neuronal contributions caused by head motion, respiration and heart rate artifacts encountered in all studied patients.**

## Introduction

Recent progress in fMRI studies on spontaneous brain activity have demonstrated activity patterns that emerge without any task or sensory stimulation, showing promise for the study of higher order associative network functionality (Biswal et al., 1995; Cordes et al., 2000; Damoiseaux et al., 2006; Fox and Raichle, 2007; Fox et al., 2005; Greicius et al., 2003; Lowe et al., 1998; Mitra et al., 1997; Nir et al., 2006; Vincent et al., 2007; Xiong et al., 1999; Yang et al., 2007). One of the most intensely studied resting state networks is the Default Mode network (DMN) which encompasses the precuneus/posterior cingulate, mesiofrontal anterior/ventral and posterior parietal cortices (for review see Fox and Raichle, 2007). This physiological “baseline” of the human brain has been suggested to be related to internally-oriented content (Vanhaudenhuyse, Demertzi, et al., 2010), self-referential or social cognition (Schilbach et al., 2008) and has been referred to as the “intrinsic network” (Fox, et al., 2005; Golland et al., 2007). Interestingly, the “default” network can be shown to anti-correlate with an “extrinsic network” (Fox, et al., 2005; Golland et al., 2008) considered to be important in externally oriented tasks (Golland, et al., 2007). The potential clinical interest of fMRI studies of DMN connectivity is currently being assessed in different pathologies such as depression (Anand et al., 2005), schizophrenia (Calhoun et al., 2009), autism (Kennedy et al., 2006), multiple sclerosis (Lowe et al., 2002), dementia (Greicius et al., 2004; Rombouts et al., 2009), brain death (see case studies by Boly et al., 2009) and disorders of consciousness (Vanhaudenhuyse, Noirhomme, et al., 2010). There are two main ways to analyze resting-state functional connectivity MRI (rs-fcMRI): (1) hypothesis-driven seed-voxel (Fox, et al., 2005) and (2) data driven Independent Component Analysis (ICA) approaches ((McKeown, et al., 1998, Kiviniemi, et al., 2003) – each offering their own advantages and limitations (Cole et al., 2010).

1  
2  
3 The seed-voxel approach consists in extracting the BOLD time course from a region of  
4 interest and determines the temporal correlation between this signal (seed) and the time course  
5 from all other brain voxels (Fox, et al., 2005). To better visualize the correlation pattern and  
6 better analyze its properties, the seed approach can be integrated with graph-theory methods  
7 (e.g., Fair et al., 2008; Hagmann et al., 2008). In rs-fcMRI graph representations, the resting-  
8 state BOLD time series for each of the ROIs extracted from the DMN are correlated among each  
9 other giving a correlation matrix which can be represented as a weighted graph. To reduce  
10 spurious variance unlikely to reflect neuronal activity, the BOLD signal is pre-processed by  
11 temporal band-pass filter and spatial smoothing, by regressing out head motion curves, whole  
12 brain signal as well as ventricular and white matter signal, and each of their first-order derivative  
13 terms (Fox, et al., 2005). This straightforward method has been widely adopted and offers  
14 consistent results (Fox and Raichle, 2007). However, it has raised some discussion mostly related  
15 to the pre-processing procedure, especially concerning the regressing out of the global activity  
16 from the BOLD signal which might induce some spurious anti-correlations (Fox et al., 2009;  
17 Murphy et al., 2009) and the selection itself of the seed regions which is biased by a priori  
18 definition.

19  
20  
21  
22  
23  
24  
25  
26  
27  
28  
29  
30  
31  
32  
33  
34  
35  
36  
37  
38  
39  
40  
41  
42  
43  
44  
45  
46  
47  
48  
49  
50  
51  
52  
53  
54  
55  
56  
57  
58  
59  
60  
61  
62  
63  
64  
65  
66  
67  
68  
69  
70  
71  
72  
73  
74  
75  
76  
77  
78  
79  
80  
81  
82  
83  
84  
85  
86  
87  
88  
89  
90  
91  
92  
93  
94  
95  
96  
97  
98  
99  
100  
101  
102  
103  
104  
105  
106  
107  
108  
109  
110  
111  
112  
113  
114  
115  
116  
117  
118  
119  
120  
121  
122  
123  
124  
125  
126  
127  
128  
129  
130  
131  
132  
133  
134  
135  
136  
137  
138  
139  
140  
141  
142  
143  
144  
145  
146  
147  
148  
149  
150  
151  
152  
153  
154  
155  
156  
157  
158  
159  
160  
161  
162  
163  
164  
165  
166  
167  
168  
169  
170  
171  
172  
173  
174  
175  
176  
177  
178  
179  
180  
181  
182  
183  
184  
185  
186  
187  
188  
189  
190  
191  
192  
193  
194  
195  
196  
197  
198  
199  
200  
201  
202  
203  
204  
205  
206  
207  
208  
209  
210  
211  
212  
213  
214  
215  
216  
217  
218  
219  
220  
221  
222  
223  
224  
225  
226  
227  
228  
229  
230  
231  
232  
233  
234  
235  
236  
237  
238  
239  
240  
241  
242  
243  
244  
245  
246  
247  
248  
249  
250  
251  
252  
253  
254  
255  
256  
257  
258  
259  
260  
261  
262  
263  
264  
265  
266  
267  
268  
269  
270  
271  
272  
273  
274  
275  
276  
277  
278  
279  
280  
281  
282  
283  
284  
285  
286  
287  
288  
289  
290  
291  
292  
293  
294  
295  
296  
297  
298  
299  
300  
301  
302  
303  
304  
305  
306  
307  
308  
309  
310  
311  
312  
313  
314  
315  
316  
317  
318  
319  
320  
321  
322  
323  
324  
325  
326  
327  
328  
329  
330  
331  
332  
333  
334  
335  
336  
337  
338  
339  
340  
341  
342  
343  
344  
345  
346  
347  
348  
349  
350  
351  
352  
353  
354  
355  
356  
357  
358  
359  
360  
361  
362  
363  
364  
365  
366  
367  
368  
369  
370  
371  
372  
373  
374  
375  
376  
377  
378  
379  
380  
381  
382  
383  
384  
385  
386  
387  
388  
389  
390  
391  
392  
393  
394  
395  
396  
397  
398  
399  
400  
401  
402  
403  
404  
405  
406  
407  
408  
409  
410  
411  
412  
413  
414  
415  
416  
417  
418  
419  
420  
421  
422  
423  
424  
425  
426  
427  
428  
429  
430  
431  
432  
433  
434  
435  
436  
437  
438  
439  
440  
441  
442  
443  
444  
445  
446  
447  
448  
449  
450  
451  
452  
453  
454  
455  
456  
457  
458  
459  
460  
461  
462  
463  
464  
465  
466  
467  
468  
469  
470  
471  
472  
473  
474  
475  
476  
477  
478  
479  
480  
481  
482  
483  
484  
485  
486  
487  
488  
489  
490  
491  
492  
493  
494  
495  
496  
497  
498  
499  
500  
501  
502  
503  
504  
505  
506  
507  
508  
509  
510  
511  
512  
513  
514  
515  
516  
517  
518  
519  
520  
521  
522  
523  
524  
525  
526  
527  
528  
529  
530  
531  
532  
533  
534  
535  
536  
537  
538  
539  
540  
541  
542  
543  
544  
545  
546  
547  
548  
549  
550  
551  
552  
553  
554  
555  
556  
557  
558  
559  
560  
561  
562  
563  
564  
565  
566  
567  
568  
569  
570  
571  
572  
573  
574  
575  
576  
577  
578  
579  
580  
581  
582  
583  
584  
585  
586  
587  
588  
589  
590  
591  
592  
593  
594  
595  
596  
597  
598  
599  
600  
601  
602  
603  
604  
605  
606  
607  
608  
609  
610  
611  
612  
613  
614  
615  
616  
617  
618  
619  
620  
621  
622  
623  
624  
625  
626  
627  
628  
629  
630  
631  
632  
633  
634  
635  
636  
637  
638  
639  
640  
641  
642  
643  
644  
645  
646  
647  
648  
649  
650  
651  
652  
653  
654  
655  
656  
657  
658  
659  
660  
661  
662  
663  
664  
665  
666  
667  
668  
669  
670  
671  
672  
673  
674  
675  
676  
677  
678  
679  
680  
681  
682  
683  
684  
685  
686  
687  
688  
689  
690  
691  
692  
693  
694  
695  
696  
697  
698  
699  
700  
701  
702  
703  
704  
705  
706  
707  
708  
709  
710  
711  
712  
713  
714  
715  
716  
717  
718  
719  
720  
721  
722  
723  
724  
725  
726  
727  
728  
729  
730  
731  
732  
733  
734  
735  
736  
737  
738  
739  
740  
741  
742  
743  
744  
745  
746  
747  
748  
749  
750  
751  
752  
753  
754  
755  
756  
757  
758  
759  
760  
761  
762  
763  
764  
765  
766  
767  
768  
769  
770  
771  
772  
773  
774  
775  
776  
777  
778  
779  
780  
781  
782  
783  
784  
785  
786  
787  
788  
789  
790  
791  
792  
793  
794  
795  
796  
797  
798  
799  
800  
801  
802  
803  
804  
805  
806  
807  
808  
809  
810  
811  
812  
813  
814  
815  
816  
817  
818  
819  
820  
821  
822  
823  
824  
825  
826  
827  
828  
829  
830  
831  
832  
833  
834  
835  
836  
837  
838  
839  
840  
841  
842  
843  
844  
845  
846  
847  
848  
849  
850  
851  
852  
853  
854  
855  
856  
857  
858  
859  
860  
861  
862  
863  
864  
865  
866  
867  
868  
869  
870  
871  
872  
873  
874  
875  
876  
877  
878  
879  
880  
881  
882  
883  
884  
885  
886  
887  
888  
889  
890  
891  
892  
893  
894  
895  
896  
897  
898  
899  
900  
901  
902  
903  
904  
905  
906  
907  
908  
909  
910  
911  
912  
913  
914  
915  
916  
917  
918  
919  
920  
921  
922  
923  
924  
925  
926  
927  
928  
929  
930  
931  
932  
933  
934  
935  
936  
937  
938  
939  
940  
941  
942  
943  
944  
945  
946  
947  
948  
949  
950  
951  
952  
953  
954  
955  
956  
957  
958  
959  
960  
961  
962  
963  
964  
965  
966  
967  
968  
969  
970  
971  
972  
973  
974  
975  
976  
977  
978  
979  
980  
981  
982  
983  
984  
985  
986  
987  
988  
989  
990  
991  
992  
993  
994  
995  
996  
997  
998  
999  
1000

Contrary to the previous approach, ICA-based rs-fcMRI analysis (McKeown, et al., 1998, Kiviniemi, et al., 2003) does not require any a priori definition of seed regions. It analyzes the entire BOLD dataset and decomposes it into components that are maximally statistically independent (Hyvarinen et al., 2001). A number of studies have shown that ICA is a powerful mathematical tool which can simultaneously extract a variety of different coherent neuronal networks (De Luca et al., 2006; Esposito et al., 2008; Greicius, et al., 2003; Greicius and Menon, 2004; Greicius et al., 2004; McKeown, et al., 1998) and separate them from other signal

1  
2  
3 modulations such as those induced by head motion or physiological confounds (e.g., cardiac  
4 pulsation, respiratory cycle and slow changes in the depth and rate of breathing, Birn et al.,  
5  
6 2008; Perlberg et al., 2007; Perlberg and Marrelec, 2008). However, ICA does not provide any  
7  
8 classification or ordering of the independent components (ICs), and it is usually left to the user to  
9  
10 decide which IC corresponds to the DMN. Automatic approaches have been proposed to remove  
11  
12 user-bias in selecting the component. For example the 'goodness of fit' is based on matching  
13  
14 with a previously built template (Greicius, et al., 2004). Self-organizing ICA groups components  
15  
16 from a group of subjects and the user (by visual inspection) selects the group that corresponds to  
17  
18 the DMN (Esposito et al., 2005). **These approaches are based on the spatial extent of the**  
19  
20 **component and some of them have been used in collaboration with a power spectrum**  
21  
22 **analysis, removing all components with more than half of the power due to high**  
23  
24 **frequencies (for the goodness of fit see Vanhaudenhuyse, Noirhomme, et al., 2010). While**  
25  
26 **having an automatic selection criteria based on spatial properties may be a big advantage**  
27  
28 **when the network spatial pattern is still partially preserved, it may become a disadvantage**  
29  
30 **for cases where the network is mostly destroyed. In these cases only properly masking the**  
31  
32 **regions of the brain where a preserved activity could be expected would help the selection**  
33  
34 **but then other imaging techniques like for example PET should be employed at the same**  
35  
36 **time. The possibility instead to realize an automatic masking procedure which will be**  
37  
38 **based only on BOLD data could then be an important solution for highly pathological**  
39  
40 **cases. At the same time giving more importance to time properties other than just the**  
41  
42 **power spectrum like temporal entropy or one-lag autocorrelation or to spatial properties**  
43  
44 **no directly pattern related like for example spatial entropy could be also a valuable tool to**  
45  
46 **improve the selection power.**  
47  
48  
49  
50  
51  
52  
53  
54  
55  
56  
57  
58  
59  
60

1  
2  
3       **The aim of this study is to assess resting state DMN connectivity in patients with**  
4  
5 **severe brain damage such as the vegetative, minimally conscious or locked-in state,**  
6  
7 **disentangling neuronal from artifactual sources. For the clinical use of these rs-fcMRI**  
8  
9 **measurements we first validated an automated, user-independent spatial ICA based**  
10  
11 **procedure to select and analyze DMN functional integrity in healthy controls. This**  
12  
13 **approach is based on both spatial and temporal information of the components. The**  
14  
15 **temporal information as well as spatial properties other than the spatial pattern is given by**  
16  
17 **the fingerprint of the component (De Martino et al., 2007). Using more information enable**  
18  
19 **a better characterization of artifactual correlations. Three different selection strategies**  
20  
21 **were developed: 1<sup>st</sup>) spatially pattern driven, 2<sup>nd</sup>) based on an automatic masking driven by**  
22  
23 **the fingerprint properties (time domain dominated), and 3<sup>rd</sup>) based on a compromise**  
24  
25 **between spatial and temporal properties. We next applied this methodology in an**  
26  
27 **independent healthy control group and patients in locked-in syndrome (i.e., pseudocoma,**  
28  
29 **LIS, Laureys et al., 2004), minimally conscious state (i.e., showing fluctuating signs of**  
30  
31 **awareness devoid of communication; MCS) or vegetative state (i.e., wakeful unawareness;**  
32  
33 **VS). For the first selection criterion which was only spatially pattern driven we expected to**  
34  
35 **perform equally well in healthy controls but more poorly than the other two in pathological**  
36  
37 **brains.**  
38  
39  
40  
41  
42  
43  
44  
45  
46  
47

## 48 **Materials and Methods**

### 49 *Subjects & MRI acquisition*

50  
51  
52  
53       **Three independent groups of healthy controls were analyzed for the full study. The**  
54  
55 **first group (group 1) was analyzed for the independent study on DMN ROIs selection**  
56  
57  
58  
59  
60



1  
2  
3  
4  
5  
6  
7  
8  
9  
10  
11  
12  
13  
14  
15  
16  
17  
18  
19  
20  
21  
22  
23  
24  
25  
26  
27  
28  
29  
30  
31  
32  
33  
34  
35  
36  
37  
38  
39  
40  
41  
42  
43  
44  
45  
46  
47  
48  
49  
50  
51  
52  
53  
54  
55  
56  
57  
58  
59  
60

(prior knowledge about the DMN equivalent to building a DMN spatial template) and for the creation of an average DMN fingerprint (De Martino, 2007). The second group (group 2) was analyzed to test the DMN selection criteria introduced in this manuscript and compare them with other available selection methods (validation of our methodology). The third group (group 3) of healthy controls was introduced to compare rs-fcMRI analyses results with respect to patients with disorders of consciousness. All subjects went through a resting state protocol in which they were instructed to keep their eyes closed and to remain awake.

*Group 1* included 11 healthy volunteers with no neurological or psychiatric history (mean age=71; SD=6; range 62-80 years; 9 women). Resting state BOLD data were acquired on a 3 T MR scanner (Trio Tim, Siemens, Germany) with a gradient echo-planar sequence using axial slice orientation (32 slices; voxel size=3.44x3.44x3.9 mm<sup>3</sup>; matrix size=64x64x32; repetition time=2130ms, echo time=40ms, flip angle=90°; field of view=220mm). A protocol of 250 scans lasting 533 seconds was performed. A T1-weighted MPRAGE sequence was also acquired for registration with functional data on each subject.

*Group 2* included 10 healthy volunteers with no neurological or psychiatric history (mean age=21; SD=3; range 18-28 years; 4 women). Resting state BOLD data were acquired on a 3 T MR (Trio Tim, Siemens, Germany) with a gradient echo-planar sequence using axial slice orientation (32 slices; voxel size=3.44x3.44x3.9 mm<sup>3</sup>; matrix size=64x64x32; repetition time=2460ms, echo time=40ms, flip angle=90°; field of view=220mm). A protocol of 350 scans lasting 861 seconds was performed. A T1-weighted MPRAGE sequence was also acquired for registration with functional data on each subject.

1  
2  
3  
4  
5  
6  
7  
8  
9  
10  
11  
12  
13  
14  
15  
16  
17  
18  
19  
20  
21  
22  
23  
24  
25  
26  
27  
28  
29  
30  
31  
32  
33  
34  
35  
36  
37  
38  
39  
40  
41  
42  
43  
44  
45  
46  
47  
48  
49  
50  
51  
52  
53  
54  
55  
56  
57  
58  
59  
60

*Group 3* included 8 healthy volunteers with no neurological or psychiatric history (mean age=48; SD=13; range 25-65 years; 3 women). Resting state BOLD data were acquired on a 3 T MR (Trio Tim, Siemens, Germany) with a gradient echo-planar sequence using axial slice orientation (32 slices; voxel size=3.0x3.0x3.75 mm<sup>3</sup>; matrix size=64x64x32; repetition time=2000ms, echo time=30ms, flip angle=78°; field of view=192mm). A protocol of 300 scans lasting 600 seconds was performed. A T1-weighted MPRAGE sequence was also acquired for registration with functional data on each subject.

Eight patients in VS (mean age=61; SD=30; range 16-87 years; all men), one minimally conscious state (age 24 years; male) and two LIS patients (aged 24 years; female and age 20 years; male) were studied with the same scanner used for the third group of healthy controls. Etiology of the VS was traumatic in 3 cases and non-traumatic in 5 cases, 3 patients were studied in the acute (i.e., < 1 months post-injury) and 5 in the chronic setting. The MCS patient was traumatic and the two LIS patients were studied 28 months post-basilar artery thrombosis and 4 years after trauma (see table 1 for patients' demographic and clinical data). All patients underwent repeated behavioral evaluations by means of the Coma Recovery Scale Revised (CRS-R, Giacino et al., 2004) and the Glasgow-Liège Scale (GLS, Born et al., 1985) performed by experienced clinicians (MB, AV, MAB, AD and SL). The diagnosis was made according to internationally accepted criteria for VS (The Multi-Society Task Force on PVS, 1994), MCS (Giacino, et al., 2004) and LIS (American Congress of Rehabilitation Medicine, 1995).

Written informed consent was obtained from all healthy volunteers, and from the legal representative of all patients (and from the LIS patients using eye-coded communication). The study was approved by the Ethics Committee of the Faculty of Medicine of the University of

1  
2  
3 Liège which complies with the Code of Ethics of the World Medical Association (Declaration of  
4  
5 Helsinki).  
6  
7

8 *Data preprocessing and analysis*  
9

10 fMRI data were preprocessed using the “BrainVoyager” software package (R. Goebel,  
11 Brain Innovation, Maastricht, The Netherlands). Preprocessing of functional scans included 3D  
12 motion correction, linear trend removal, slice scan time correction and filtering out low  
13 frequencies of up to 0.005 Hz. The data were spatially smoothed with a Gaussian filter of full  
14 width at half maximum value of 8 mm. **The functional images from each subject were aligned  
15 to the participant's own anatomical scan and warped into the standard anatomical space of  
16 Talairach and Tournoux (1988). The Talairach transformation was performed in two steps.  
17 The first step consisted in rotating the 3-D data set of each subject to be aligned with  
18 stereotaxic axes (for this step the location of the anterior commissure (AC), the posterior  
19 commissure (PC) and two rotation parameters for midsagittal alignment were specified  
20 manually). In the second step, the extreme points of the cerebrum were specified. These  
21 points together with the AC and PC coordinates were then used to scale the 3-D data sets  
22 into the dimensions of the standard brain of the Talairach and Tournoux (1988) atlas using  
23 a piecewise affine and continuous transformation. ICA (Hyvarinen et al., 2001; Formisano  
24 et al., 2004) was performed with the “BrainVoyager” software package using thirty  
25 components (Ylipaavalniemi and Vigario, 2008; Meindl et al, 2010; Weissman-Fogel et al,  
26 2010; Koch et al, 2010; Jafri et al, 2008). A spatial mean was subtracted from all the voxels  
27 (mean calculated all over the voxels at a fixed time) and principal component analysis was  
28 applied for dimensionality reduction before performing ICA.**  
29  
30  
31  
32  
33  
34  
35  
36  
37  
38  
39  
40  
41  
42  
43  
44  
45  
46  
47  
48  
49  
50  
51  
52

53 *Decomposing connectivity in independent component graphs*  
54  
55  
56  
57  
58  
59  
60

1  
2  
3  
4  
5  
6  
7  
8  
9  
10  
11  
12  
13  
14  
15  
16  
17  
18  
19  
20  
21  
22  
23  
24  
25  
26  
27  
28  
29  
30  
31  
32  
33  
34  
35  
36  
37  
38  
39  
40  
41  
42  
43  
44  
45  
46  
47  
48  
49  
50  
51  
52  
53  
54  
55  
56  
57  
58  
59  
60

We developed here a new methodology which takes advantage of the capability of ICA to decompose the signal in neuronal and artifactual sources but still preserves the concept of connectivity in a defined network of ROIs. This methodology in fact allows building for each IC a connectivity graph which summarizes the level of connectivity for a defined network of ROIs according to the time behavior described by the correspondent IC time course. Our connectivity study employed thirteen ROIs defined on an average DMN map calculated on a group of eleven healthy subjects (group 1). We performed, as implemented in Brain Voyager (self-organizing ICA Esposito, et al., 2005) a spatial similarity test on single subjects ICs and we averaged the maps belonging to the cluster which was selected by visual inspection as DMN. The selected thirteen ROIs were the most representative regions of our average DMN map close to the DMN target points previously published (Fair, et al., 2008; Fox, et al., 2005) including: medial prefrontal cortex ventral (MFv) [-3, 39, -2], medial prefrontal cortex anterior (MFa) [2, 59, 16], posterior cingulate/precuneus (pC) [-3, -55, 21], left posterior parietal lobe (L-pP) [-49, -60, 23], right posterior parietal lobe (R-pP) [45, -61, 21], left superior frontal gyrus (L-sF) [-19, 32, 51], right superior frontal gyrus (R-sF) [23, 29, 51], left middle temporal gyrus anterior (L-aT) [-61, -11, -10] right middle temporal gyrus anterior (R-aT) [57, -11, -13], left parahippocampal /mesiotemporal (L-mT) [-23, -17, -17], right parahippocampal /mesiotemporal (R-mT) [25, -16, -15], left thalamus (L-T) [-5, -11, 7] and right thalamus (R-T) [4, -11, 6] (the ROIs were set initially to a cubic shape  $10 \times 10 \times 10 \text{ mm}^3$ , and the center was chosen accordingly to the DMN extracted from group 1 but once the ROI was saved in Brain Voyager only the ROI's voxels belonging to the DMN end up making the saved ROI).

1  
2  
3  
4 To study connectivity between each pair of target points, we implemented a new method  
5 which is based on ICA followed by a General Linear Model (GLM). After running ICA with  
6 thirty components, we used the corresponding time courses to regress in the BOLD signal in  
7 each of the thirteen ROIs. **The time courses from each ROI were extracted as the arithmetic**  
8 **mean of the time courses of the voxels belonging to the same ROI. Note that by using a**  
9 **smoothing of a 8mm kernel implies that taking an arithmetic mean as implemented in**  
10 **Brain Voyager or extracting the first eigenvariate will give similar results.** For each  
11 component we obtained thirteen parameter estimates (beta values) indicating the weight of each  
12 regressor and the corresponding T-values (see appendix). In order to build a connectivity graph  
13 we drew an edge between each pair of target points with  $T > T_{th}$  with  $T_{th}$  corresponding to  $1-p/78$   
14 for  $p=0.05$  with 267 degrees of freedom (Bonferroni correction for multiple comparisons was  
15 performed dividing  $p$  by the number of possible edges between the thirteen nodes;  $13*(13-$   
16  $1)/2=78$ ). To account for the fact that ICA does not predict the sign of the ICs, the condition  $T < -$   
17  $T_{th}$  was also used. This allowed us to end up with two connectivity graphs for each of the thirty  
18 components (1-30 for the condition  $T > T_{th}$  and 31-60 for  $T < -T_{th}$ ). We hypothesized that the  
19 number of edges  $E$  for each of the 60 connectivity graphs should be the highest for the  
20 component of the DMN. However, given that no regressing out of the global signal was applied,  
21 we did not pick the component corresponding to the graph with the largest number of total edges  
22 (i.e., the global component could appear as the main source of connectivity). Therefore, we  
23 implemented “anticorrelation-corrected number of edges” (see figure 1). The anticorrelation-  
24 corrected number of edges was obtained by multiplying the total number of edges of each graph  
25 by a weight “ $w$ ” which measures the anti-correlation of the DMN activity with the extrinsic  
26 system/external control network (ECN). Similarly to the thirteen targets ROIs of the DMN, we  
27  
28  
29  
30  
31  
32  
33  
34  
35  
36  
37  
38  
39  
40  
41  
42  
43  
44  
45  
46  
47  
48  
49  
50  
51  
52  
53  
54  
55  
56  
57  
58  
59  
60

1  
2  
3 selected as ROIs the five most representative regions of the extrinsic system appearing as anti-  
4 correlated regions in the DMN average map calculated on the group 1 of healthy subjects close  
5 to the ECN target points previously published (Fox, et al., 2005) including: (left supramarginal  
6 gyrus (L-SmG) [-56, -33, 37], right supramarginal gyrus (R-SmG) [54, -39, 38], left middle  
7 temporal gyrus posterior (L-MTGp) [-52, -53, -5], right middle temporal gyrus posterior (R-  
8 MTGp) [52, -57, -5] and supplementary motor area (SMA) [2, 5, 46]). The anticorrelation-  
9 corrected number of edges  $E_{AntiCC}$  was then defined in terms of the number of edges  $E$  as  $E_{AntiCC} =$   
10  $E * w$  (see appendix), with the anti-correlation index  $w$  a number between 0 and 1. The index  
11 would be close to 0 if the activity in the extrinsic network highly correlates with the activity in  
12 the intrinsic network, e.g. a global signal, and close to 1 if the activity in the extrinsic network is  
13 anti-correlated with the activity in the DMN, e.g. the DMN component. A new number of edges  
14 could be built by just inverting the  $\pm$  signs in the definition of  $E_{AntiCC}$  (see appendix) obtaining a  
15 new number which we called “global edges” and which is highest for the global component (see  
16 figure 1). This allowed us to isolate the global mode and to remove it from the full set of  
17 components.

### 38 *Selection criteria*

39  
40 **Three different strategies were developed: 1<sup>st</sup>) spatially pattern driven, 2<sup>nd</sup>) based on**  
41 **an automatic masking driven by the fingerprint properties (time domain dominated), and**  
42 **3<sup>rd</sup>) based on a compromise between spatial and temporal properties.**

43  
44  
45  
46  
47  
48 *1<sup>st</sup> selection criterion:* This selection criterion selects as the DMN the component with the  
49 highest number of anticorrelation-corrected edges (see figure 1). The number of anticorrelation-  
50 corrected edges of the component selected is indicated in tables 1-2 of the supplementary  
51 material with the name “ $E_{AntiCC}$  *init*”.

1  
2  
3 **2<sup>nd</sup> selection criterion:** This selection criterion is still based on the highest number of edges  
4  
5 but after performing an automatic masking obtained by removing subsequently regions of  
6  
7 interest from the network (see flow chart and appendix for the definition of the distance  
8  
9  $D_{IC}$ ). The automatic masking proceeded by removing subsequently (going through all the  
10  
11 thirteen ROIs) one region of interest (1<sup>st</sup> step), then two regions together (2<sup>nd</sup> step), three  
12  
13 regions up to five regions (last step). At each step the component selected as the one with  
14  
15 the highest number of anticorrelation-corrected edges in the reduced network and with the  
16  
17 minimum distance among all the possible reduced networks (for that step) was tested by  
18  
19 comparing its fingerprint (as in De Martino et al., 2007 the fingerprint reports normalized  
20  
21 values respectively for: degree of clustering, skewness, kurtosis, spatial entropy as  
22  
23 calculated from the distribution of the z values for the considered independent component  
24  
25 and one lag autocorrelation, temporal entropy, and the power of the five frequency bands  
26  
27 [0-0.008 Hz, 0.008-0.02 Hz, 0.02-0.05 Hz, 0.05-0.1 Hz, 0.1-0.25 Hz] as extracted from the  
28  
29 time course of the considered IC) with an average fingerprint (distance  $D_{IC}$  from the  
30  
31 reference fingerprint needed to be inside 2 standard deviations with the standard deviation  
32  
33 calculated on each subject IC distances' distribution) built from the DMN components of  
34  
35 the eleven healthy subjects (group 1). The number of anticorrelation-corrected edges of the  
36  
37 component selected is indicated in tables 1-2 of the supplementary material with the name  
38  
39 " $E_{AntiCC\ fin}$ ".  
40  
41  
42  
43  
44  
45  
46  
47

48 **3<sup>rd</sup> selection criterion:** The third automatic selection criterion selects the component with the  
49  
50 highest "anticorrelation-corrected score" ( $S_{AntiCC}$ ), built by multiplying the number of  
51  
52 anticorrelation-corrected edges by a new weight " $w_F$ " which measures the distance of its  
53  
54 fingerprint from the average fingerprint of the DMN in healthy controls (group 1). **The weight**  
55  
56  
57  
58  
59  
60

1  
2  
3  $w_F$  is close to 0 for components which have “artefactual” source and close to 1 for  
4  
5 components with “neuronal” origin - the latter assumes that in healthy controls ICA was  
6  
7 able to fully separate artefactual from neuronal sources. The number of anticorrelation-  
8  
9 corrected edges of the component selected is indicated in tables 1-2 of the supplementary  
10  
11 material with the name “ $E_{AntiCC} (S_{AntiCC} max)$ ”.

12  
13  
14  
15 The three selection criteria were compared with self-organizing ICA which selected for  
16  
17 each single subject the most spatially similar component to a DMN average map based on the  
18  
19 eleven healthy subjects of group 1 (self-organizing ICA used to cluster 30 average maps vs. 30  
20  
21 IC’s maps).

#### 22 23 24 *Single subject and group analysis*

25  
26  
27 For each single subject we presented a connectivity graph showing thin and thick lines in  
28  
29 three colors: red, orange and yellow. Thin and thick lines correspond respectively to the  
30  
31 conditions  $T > T_{th}$  and  $T * w > T_{th}$  (thin line for edges and thick line for “weighted edges” ( $E_w$ )), and  
32  
33 the three colors: red, orange and yellow correspond respectively to p values  $p=0.05$ ,  $p=0.01$  and  
34  
35  $p=0.001$ . It is important to note that the number of anticorrelation-corrected edges, as previously  
36  
37 stated, is calculated by the number of edges  $E$  (number of edges in the graph corresponding to  
38  
39 the condition  $T > T_{th}$  for  $p=0.05$  multiplied by the corresponding anti-correlation index  $w$ ) and is  
40  
41 not obtained by counting the number of edges corresponding to the conditions  $T * w > T_{th}$  termed  
42  
43 ‘weighted edges’ (see tables 1-2 in the supplementary material to compare values).  
44  
45  
46  
47

48  
49 Two-tailed unequal variance Student T-test compared the total number of edges, the anti-  
50  
51 correlation index, the anticorrelation-corrected total number of edges, the total number of  
52  
53 weighted edges, the anticorrelation-corrected scores and the ratio of the anticorrelation-corrected  
54  
55  
56  
57  
58  
59  
60



1  
2  
3 score over the anticorrelation-corrected total number of edges in the DMN in controls vs. VS  
4  
5 patients for each of the three different selection criteria.  
6  
7

8 Spatial maps were obtained by running a two step analysis. First the BOLD signal from  
9  
10 each single subject was regressed with the time courses of the ICs selected as DMN as selected  
11  
12 by the second selection criterion (automatic masking). Second the estimated parametric maps  
13  
14 entered a multi-subject random effect analysis providing group level statistical T-maps. Maps  
15  
16 were thresholded at a false discovery rate corrected  $p < 0.05$  within DMN mask obtained from an  
17  
18 independent dataset (group 1) shown as black and white contour volume of interest in figure 3, 5,  
19  
20 6 and 7. The mean connectivity graph was derived by drawing an edge between each pair of  
21  
22 ROIs with a sum of anticorrelation-corrected beta-values  $\beta \cdot w$  significantly different  
23  
24 (permutation test) from the absolute value of their difference. Different colors correspond to  
25  
26 differences in significance, with red, orange and yellow representing  $p = 0.05$ ,  $p = 0.01$  and  
27  
28  $p = 0.001$  respectively. Thicker lines are the connections which survive a multi comparison  
29  
30 Bonferroni correction with the number of possible edges between the thirteen nodes:  $13 \cdot (13 -$   
31  
32  $1) / 2 = 78$ .  
33  
34  
35  
36  
37  
38

39 A contrast T-test map indicates the regions where the DMN time courses for controls and  
40  
41 VS patients predicted in a significant different way the BOLD signal with respect to the mean  
42  
43 signal. The difference graph shows a connection between each pair of ROIs for which the sum of  
44  
45 anticorrelation-corrected beta-values minus their difference is significantly different  
46  
47 (permutation test) between controls and VS patients. The colors and thickness for the edges in  
48  
49 the difference graph have the same meaning as in the mean graph.  
50  
51  
52  
53  
54

## 55 Results

56  
57  
58  
59  
60

### *Healthy controls*

In group 2 of controls (see Table 1 in the supplementary material) the three different connectivity ICA methods identified the same DMN at the single subject level. Cross validation with self-organizing ICA showed concordance of the selected network in all healthy volunteers. In group 3 of controls (see Table 2 in the supplementary material) cross validation with self-organizing ICA showed concordance of the selected network in six out of eight healthy volunteers. The time course of the selected DMN showed a power spectrum peaking in the range 0.02-0.05 Hz. At the group level (figure 4), the nodes showing the highest number of significant connections (edges surviving Bonferroni correction) were the ventral and anterior medial prefrontal cortices (number of edges=7) followed by the precuneus/PCC (number of edges=4), and left and right posterior parietal cortex (number of edges=3). Healthy controls mean spatial map identified the DMN pattern as shown in figure 3. As confirmed by the connectivity graph, the regions which are the predominant representatives of the DMN are medial prefrontal cortex anterior and ventral, precuneus, left and right posterior parietal lobes and left and right superior frontal gyrus.

### *VS patients' group data*

VS patients' spatial map (figure 3) showed no significant pattern as also confirmed by the connectivity graph (time courses corresponding to the DMN selected by the second selection criterion have been used). The contrast control vs. VS patients' spatial map didn't show any significant result when thresholded at false discovery rate corrected  $p < 0.05$  within a DMN mask obtained from an independent dataset of healthy controls (group 1). On the contrary differences in connectivity graphs highlighted the connection between the medial prefrontal cortex ventral and the precuneus as well as between the medial prefrontal cortex ventral and the left and right

1  
2  
3 lateral parietal, the left and right superior frontal gyrus, the left anterior temporal gyrus and the  
4 medial prefrontal cortex anterior. Compared to controls, VS patients graphs showed a significant  
5 lower total number of edges (numbers are approximated to integer,  $41 \pm 13$ , range 21-66 vs.  
6 respectively for the three selection criteria: 1<sup>st</sup>:  $17 \pm 5$ , range 15-28,  $p < 0.001$ , 2<sup>nd</sup>:  $10 \pm 4$ , range 6-  
7 15,  $p < 0.001$ , 3<sup>rd</sup>:  $14 \pm 2$ , range 10-15,  $p < 0.001$ ) as well as the anti-correlation index ( $0.72 \pm 0.09$ ,  
8 range 0.55-0.83 vs. respectively for the three selection criteria: 1<sup>st</sup>:  $0.57 \pm 0.08$ , range 0.42-0.69,  
9  $p = 0.004$ , 2<sup>nd</sup>:  $0.52 \pm 0.10$ , range 0.41-0.65,  $p < 0.001$ , 3<sup>rd</sup>:  $0.56 \pm 0.08$ , range 0.43-0.69,  $p = 0.003$ ).  
10 Significant differences (which confirmed previous results) were observed in the total number of  
11 anticorrelation-corrected edges (numbers are approximated to integer,  $30 \pm 12$ , range 14-53 vs.  
12 respectively for the three selection criteria: 1<sup>st</sup>:  $10 \pm 2$ , range 8-12,  $p = 0.002$ , 2<sup>nd</sup>:  $3 \pm 2$ , range 3-9,  
13  $p < 0.001$ , 3<sup>rd</sup>:  $8 \pm 2$ , range 4-10,  $p < 0.001$ ) as well as total number of weighted edges ( $18 \pm 10$ , range  
14 4-29 vs. respectively for the three selection criteria: 1<sup>st</sup>:  $1 \pm 2$ , range 0-6,  $p = 0.002$ , 2<sup>nd</sup>:  $1 \pm 1$ , range  
15 0-3,  $p = 0.002$ , 3<sup>rd</sup>:  $1 \pm 2$ , range 0-6,  $p = 0.002$ ). For the anticorrelation-corrected scores, which  
16 summarized in a single number both spatial and temporal properties, compared to controls, VS  
17 patients showed a lower anticorrelation-corrected score (numbers are approximated to integers,  
18  $21 \pm 9$ , range 7-38 vs. respectively for the three selection criteria: 1<sup>st</sup>:  $2 \pm 1$ , range 1-4,  $p < 0.001$ , 2<sup>nd</sup>:  
19  $3 \pm 1$ , range 1-5,  $p < 0.001$ , 3<sup>rd</sup>:  $3 \pm 1$ , range 1-5,  $p < 0.001$ ). The weight  $w_F$ , which is a measure of  
20 the nature of the IC selected (artefactual (low) vs. neuronal (high)), showed, compared to  
21 controls lower values in VS patients ( $0.68 \pm 0.14$ , range 0.47-0.84 vs. respectively for the three  
22 selection criteria: 1<sup>st</sup>:  $0.24 \pm 0.07$ , range 0.16-0.36,  $p < 0.001$ , 2<sup>nd</sup>:  $0.48 \pm 0.18$ , range 0.24-0.74,  
23  $p = 0.03$ , 3<sup>rd</sup>:  $0.40 \pm 0.19$ , range 0.16-0.70,  $p = 0.005$ ). In figure 3 the mean DMN fingerprint for  
24 controls (yellow line) showed the characteristic bird shape (De Martino, et al., 2007) with a  
25 predominant frequency band of 0.02-0.05 Hz, high level of clustering and one-lag  
26  
27  
28  
29  
30  
31  
32  
33  
34  
35  
36  
37  
38  
39  
40  
41  
42  
43  
44  
45  
46  
47  
48  
49  
50  
51  
52  
53  
54  
55  
56  
57  
58  
59  
60

1  
2  
3 autocorrelation. The mean DMN fingerprint (DMN components were selected with the second  
4 selection criterion) for VS patients (cyan line) did not show a normal bird like shape but showed  
5 a predominant frequency of 0.1-0.25 Hz even if the contribution in the frequency band of 0.02-  
6 0.05 Hz was still important. Significant lower temporal entropy was also observed in VS patients  
7 respect to healthy controls. Finally VS patients moved in the scanner more than healthy  
8 volunteers showing compared to controls higher even if not significantly different  
9 “displacement” and “speed” (see appendix for definition; displacement= $0.95\pm 0.67$ , range 0.2-  
10 2.2 vs.  $2.3\pm 2.0$ , range 0.2-5.9,  $p=0.11$ ; speed= $0.07\pm 0.04$ , range 0.02-0.13 vs.  $0.28\pm 0.30$ , range  
11 0.08-0.96,  $p=0.08$ ).

#### 22 *Patients' single subject analysis*

23  
24  
25  
26  
27 Single subjects analysis refers to the DMN selected using the second criterion. None of  
28 the VS patients showed a DMN with both the spatial and temporal patterns comparable with  
29 healthy controls (see figure 6 and figure 7). Rapid transient “clonic” movements were observed  
30 for all patients. Spatial maps showed periphery patterns characteristic of motion artefacts.  
31 Individual fingerprint analysis showed a shift towards the higher frequency bands (0.1-0.25 Hz)  
32 especially in VS patients 1, 4, 6 and 8. In patients 1 and 8, a contribution in the low frequency  
33 band (0.02-0.05 Hz) was also observed while for patients 2, 3, 5 and 7 the component selected  
34 was dominated by a low frequency behavior (0.02-0.05 Hz). Graph analysis showed some  
35 residual connections (weighted edges) in patient 2 (between precuneus and right lateral parietal  
36 posterior and anterior temporal gyri), in patient 5 (between left and right superior frontal gyrus)  
37 and in patient 8 (between precuneus and right lateral parietal posterior and left thalamus). In  
38 patient 2 we also observed substantial movement throughout the recording with a highly  
39 correlated power spectrum of the BOLD time course and the motion parameter curves.  
40  
41  
42  
43  
44  
45  
46  
47  
48  
49  
50  
51  
52  
53  
54  
55  
56  
57  
58  
59  
60

1  
2  
3 The two locked-in patients (figure 5) showed near-normal DMN connectivity spatial  
4 pattern despite substantial movement artifacts (the three selection criteria gave the same  
5 component). In the temporal domain an increase in the high frequencies was observed for patient  
6 1 even if the contribution in the frequency band (0.02-0.05 Hz) was preserved. For patient 2, a  
7 proper fingerprint was observed. The connectivity graphs were characterized respectively by 28  
8 and 36 total number of edges and an anti-correlation index of 0.74 for both patients giving  
9 respectively 21 and 27 total number of anticorrelation-corrected connections which were not  
10 significantly different from healthy controls ( $p=0.27$ ) and counted 21 and 28 weighted edges  
11 ( $p=0.25$ ). The anticorrelation-corrected scores were respectively 14.0 and 16.6 in line with  
12 healthy controls. The weight  $w_F$  with values 0.67 and 0.62 were also in the healthy volunteers'  
13 range. The MCS patient showed a proper DMN spatial pattern in the right hemisphere as also  
14 confirmed by the connectivity graph. A proper time course behavior was also observed together  
15 with a proper fingerprint. The total number of edges was 10 (second and third selection criteria)  
16 with an anti-correlation index of 0.65 giving a number of anticorrelation-corrected edges of 6.5,  
17 the weighted edges 6 and a score of 3.6 with the anticorrelation-corrected edges and the  
18 anticorrelation-corrected score consistent with VS patients but with the weighted edges being  
19 lower of healthy controls and higher than VS patients. The weight  $w_F$  was consistent with  
20 healthy controls.  
21  
22  
23  
24  
25  
26  
27  
28  
29  
30  
31  
32  
33  
34  
35  
36  
37  
38  
39  
40  
41  
42  
43  
44  
45  
46  
47

## 48 Discussion

49 We have here assessed different methodologies aiming to identify the DMN based on  
50 **spatial** ICA in the challenging patient population of severe brain damage. Three different  
51 strategies were developed: (i) spatially **pattern** driven; (ii) based on an automatic masking  
52  
53  
54  
55  
56  
57  
58  
59  
60

1  
2  
3 driven by the fingerprint properties (time domain dominated), and (iii) based on a compromise  
4 between spatial and temporal properties. After testing that the three strategies selected the same  
5 DMN component on an independent group of ten healthy controls we confirmed the validity of  
6 the three strategies by comparing results with those obtained by running self-organizing ICA as  
7 implemented in Brain Voyager (*similar results were obtained by preprocessing data in SPM*  
8 *and running ICA in FSL and then comparing our selection criteria with the similarity or the*  
9 *goodness of fit tests with or without selecting components based on their power spectrum*). We  
10 next applied our methodology to another independent group of eight healthy controls, eight VS,  
11 two LIS and one MCS patients. Each of the three connectivity spatial ICA strategies permitted to  
12 identify the DMN at the single subject level in a user-independent manner. In the group of eight  
13 healthy controls, the three methods identified the same component characterized by the typical  
14 spatial pattern of the DMN (Beckmann et al., 2005) accompanied by a corresponding time course  
15 with a power spectrum peaking in the range 0.02-0.05 Hz. Cross validation with self-organizing  
16 ICA showed concordance of the selected network in six out of eight healthy volunteers. In the  
17 two subjects where both methods disagreed, post-hoc analysis showed that self-organizing ICA  
18 identified a network with a spatial pattern resembling the DMN but with a time course peaking at  
19 higher frequency with respect to the time course of the network selected by our methodology  
20 which was dominated by neuronal frequencies (e.g., 0.01-0.05 Hz, De Luca, et al., 2006). The  
21 DMN fingerprint confirmed the previously reported characteristic bird shape pattern in all  
22 healthy controls with a predominant frequency band of 0.02-0.05 Hz, high level of clustering and  
23 one-lag autocorrelation (De Martino, et al., 2007).

24  
25  
26  
27  
28  
29  
30  
31  
32  
33  
34  
35  
36  
37  
38  
39  
40  
41  
42  
43  
44  
45  
46  
47  
48  
49  
50  
51  
52  
53 For VS patients, the three selection criteria did not agree on the selected component. To  
54 have an indication of which of the three criteria, which worked equally well in healthy subjects,  
55  
56  
57  
58  
59  
60

1  
2  
3 could be the one with more selection power in highly pathological brains, we decided to test our  
4 three methods on a MCS patient. **In this patient the DMN was easily detectable by visual**  
5 **inspection of the spatial pattern together with the fingerprint. The presence of the DMN**  
6 **only in the right hemisphere was in accordance with cerebral metabolic PET data**  
7 **suggesting a neuronal activity pattern consistent with healthy controls only in the right**  
8 **hemisphere. The finding that only the second and the third selection criteria were able to**  
9 **pick the right component as DMN in this patient may illustrate the advantage of these last**  
10 **two methods in highly pathological brains where spatial patterns may be partially**  
11 **destroyed. In order to detect residual patterns of neuronal activity it is probably more**  
12 **important to give more or equal selecting power to time than to space. Given the obtained**  
13 **results, we decided to use the second selection criterion because its fingerprint-based**  
14 **procedure guiding the automatic masking seemed promising to identify for the DMN a**  
15 **component with neuronal source.** Using our second selection criterion, our method did not  
16 identify a single connection between DMN nodes which reached statistical significance at the VS  
17 patient group level and failed to show any significant voxel that showed a consistent pattern of  
18 DMN connectivity. The mean DMN fingerprint was not bird-shape like (even if the second  
19 selection criterion gave the most similar fingerprint to healthy controls) but showed a  
20 predominant frequency of 0.1-0.25 Hz which was significantly higher from that observed in  
21 healthy controls. It is important to stress that broadband ultra-slow fluctuations (<0.1 Hz) in  
22 BOLD fMRI and in neuronal activity typically show a 1/f power profile (Nir et al., 2008) with no  
23 predominant frequency, while narrow-band spontaneous fluctuations around 0.1Hz (as observed  
24 in the VS group) have been shown to be implicated in non-neuronal processes such as  
25 vasomotion (Mitra, et al., 1997). This shift toward higher frequencies in the DMN could be  
26  
27  
28  
29  
30  
31  
32  
33  
34  
35  
36  
37  
38  
39  
40  
41  
42  
43  
44  
45  
46  
47  
48  
49  
50  
51  
52  
53  
54  
55  
56  
57  
58  
59  
60

1  
2  
3 caused by pulse and respiration artifacts (and their aliasing) (De Luca, et al., 2006). With a TR of  
4  
5 2 s (corresponding to a sampling rate of 0.5 Hz and a Niquist frequency ( $N_f$ ) of 0.25 Hz) aliasing  
6  
7 may be an important source of artifact. For example, a respiratory rate of 12 breaths/min (i.e., 0.2  
8  
9 Hz  $< N_f$ ) will not be aliased, while its first harmonic of 0.4 HZ (i.e.,  $> N_f$ ) is aliased at  $|0.4\text{Hz}-$   
10  
11  $0.5\text{Hz}|=0.1\text{Hz}$ . Similarly, a heart rate of (for example) 63 beats/min (1.05 Hz) is aliased at  
12  
13  $|1.05\text{Hz}-2*0.5\text{Hz}|=0.05\text{Hz}$  appearing in the DMN characteristic frequency range. The frequency  
14  
15 band that was lower in VS patients as compared to controls was 0.008-0.02 Hz possibly  
16  
17 reflecting a decrease in DMN neuronal activity. The temporal entropy and one-lag  
18  
19 autocorrelation were also shown to be decreased in VS patients possibly explained by  
20  
21 respectively movement artifacts and high frequency time course behavior caused by pulse and  
22  
23 respiratory artifacts. The clustering, skewness, kurtosis and spatial entropy were not different  
24  
25 between VS patients and controls, presumably indicating that the spatial properties of neuronal  
26  
27 DMN activity and artifacts (i.e., pulse, respiration, movement and global effects) might be  
28  
29 comparable. However, this does not imply that artifacts would show a similar spatial pattern as  
30  
31 the DMN. **When the DMN does not exist or some other component (e.g., motion, heart or**  
32  
33 **respiratory rate) gives a higher contribution to connectivity - even if a fingerprint driven**  
34  
35 **selection criterion tends to suppress this scenario - then the artifactual IC provides an**  
36  
37 **upper bound on the connectivity number of edges for the DMN (i.e., a component is *de***  
38  
39 ***facto* always selected).**

40  
41 The connectivity study showed no overlap between the number of “anticorrelation-  
42  
43 corrected connections” or edges in VS patients and in controls. Connectivity graph analysis  
44  
45 identified anterior-posterior midline disconnections in VS, in line with previous studies  
46  
47 emphasizing the critical role of the precuneus/PCC and mesiofrontal cortices in the emergence of  
48  
49  
50  
51  
52  
53  
54  
55  
56  
57  
58  
59  
60



1  
2  
3 conscious awareness (Boly et al., 2008; Vanhaudenhuyse et al., 2009). Indeed, these areas are  
4 among the most active brain regions in conscious waking (Gusnard et al., 2001) and are among  
5 the least metabolically active regions in VS (Laureys, et al., 2004) and in other states of altered  
6 consciousness such as general anesthesia (Alkire and Miller, 2005), sleep (Maquet, 1997),  
7 hypnotic state (Rainville et al., 2002) or dementia (Minoshima et al., 1997). It has been  
8 suggested that these richly connected multimodal medial associative areas are part of the neural  
9 network sub serving consciousness (Baars et al., 2003) and self-awareness (Hagmann, et al.,  
10 2008; Laureys et al., 2007). It is important to stress here that the difference in anticorrelation-  
11 corrected connectivity measured between VS patients and healthy controls is a combined result  
12 of both the reduction in the positive correlation between the regions of the DMN and of the anti-  
13 correlation with the regions of the ECN. A reduction is in fact observed in both the number of  
14 edges and the anti-correlation index in VS patients with respect to healthy controls (see Table 2  
15 in the supplementary material).  
16  
17  
18  
19  
20  
21  
22  
23  
24  
25  
26  
27  
28  
29  
30  
31  
32  
33

34 At the single subject level, none of the VS patients showed a DMN with a spatial and  
35 temporal pattern that was comparable with that observed in healthy controls. It should be noted  
36 that only in patient VS2 as for the MCS patient the metabolic PET study reported a preserved  
37 neuronal activity only in the right hemisphere, which was the hemisphere showing a preserved  
38 DMN spatial pattern (as illustrated by the connectivity graph) and with a DMN time course  
39 consistent with neuronal activity. Individual fingerprint analysis showed a shift towards the  
40 higher frequency bands (0.1-0.25 Hz) in 4 out of 8 VS patients (VS cases 1, 4, 6 and 8; see figure  
41 6a,d and figure 7b,d) possibly caused by pulse or respiration artifacts (or by their aliasing).  
42 Aliasing of pulse and respiration frequencies could also explain the increase in lower frequency  
43 bands observed in VS patients (VS 2, 3, 5 and 7) where normal DMN neural activity is known to  
44  
45  
46  
47  
48  
49  
50  
51  
52  
53  
54  
55  
56  
57  
58  
59  
60

1  
2  
3 peak (see figure 6b,c and figure 7a,c). However, in the absence of simultaneous recording of  
4 heart and respiratory rates during the fMRI acquisitions, this remains speculative and one cannot  
5 here formally exclude the presence of a neuronal contribution. **Note that** in addition to  
6 **simultaneously recording of physiological parameters, future studies should use a shorter**  
7 **TR which will strongly reduce the aliasing of high frequency (albeit covering a fewer**  
8 **number of slices).** Graph analyses also showed some residual connections (corrected for global  
9 effects) in VS patient 2 (between precuneus and right lateral parietal posterior and right anterior  
10 temporal gyrus), in VS5 (between right and left superior frontal gyrus) and VS8 (between  
11 precuneus and right lateral parietal posterior and left thalamus). In our view, these results may  
12 not reflect residual DMN neuronal activity but can be explained by pulse, respiratory and mainly  
13 movement artifacts. The particular case of VS2 deserves some more caution because of the  
14 consistency between the spatial pattern and the independent observed metabolic PET data (also  
15 clinically the patient was considered a borderline MCS case). Patient VS8 was the only VS  
16 patient that subsequently recovered minimal signs of consciousness.  
17  
18  
19  
20  
21  
22  
23  
24  
25  
26  
27  
28  
29  
30  
31  
32  
33  
34  
35

36 Despite substantial movement artifacts, the two locked-in patients showed in the spatial  
37 domain a near-to-normal DMN connectivity pattern. In the temporal domain, the movements  
38 caused for LIS1 an increase in the high frequency band without masking the neuronal  
39 contribution in the lower frequency bands. The graph analysis showed a connectivity pattern  
40 indistinguishable from that observed in healthy controls. The MCS patient showed a DMN  
41 pattern intermediate between healthy controls and VS patients, suggesting that the extracted  
42 variables employed for individual graph analyses may offer a classification of the level of  
43 consciousness in these challenging patients - as has been shown at the group level  
44 (Vanhaudenhuyse, Noirhomme, et al., 2010). When dealing with DOC patients major confounds  
45  
46  
47  
48  
49  
50  
51  
52  
53  
54  
55  
56  
57  
58  
59  
60

1  
2  
3 in resting state fMRI acquisitions are movement, pulse and respiration (and their aliasing) and  
4 global effect artifacts (Soddu et al., in press). Future clinical studies should therefore perform  
5 simultaneous heart and respiratory rate recordings (Gray et al., 2009) and real movement  
6 monitoring.  
7  
8  
9  
10  
11

12 **Normalization procedures are also very important issues when dealing with severe**  
13 **brain injury and highly deformed or, especially for chronic cases, atrophied brains (Dai et**  
14 **al., 2008). In the present study, anatomical placements of all ROI positions were visually**  
15 **checked to make sure no artefactual signal from non-neuronal ventricular or white matter**  
16 **structures were included. Finally it is important to stress, that our presented methodology**  
17 **cannot protect against the well-known problem of over- or under-splitting of brain**  
18 **networks, inherent to ICA. In the case of ICA decompositions, higher dimensionalities of**  
19 **the model have recently been advocated (Kiviniemi et al., 2009; Smith et al., 2009),**  
20 **although the robustness of a given level of decomposition relies on being supported by data**  
21 **quality. The highly pathological brains of DOC patients do not allow quite often having**  
22 **good quality BOLD data. Using a limited number of components for the ICA**  
23 **decomposition may then probably result in a better solution. For the above reasons**  
24 **tackling DMN splitting issue remains a very methodological challenge.**  
25  
26  
27  
28  
29  
30  
31  
32  
33  
34  
35  
36  
37  
38  
39  
40  
41  
42  
43  
44  
45  
46  
47

## 48 **Conclusion**

49  
50 We here proposed a user-independent constrained connectivity ICA method with three  
51 different selection criteria based on spatial and temporal information permitting DMN  
52 component selection at the single subject level. When applied to healthy subjects the three  
53  
54  
55  
56  
57  
58  
59  
60

1  
2  
3 criteria (i.e., (i) spatially **pattern** driven; (ii) based on an automatic masking driven by the  
4  
5 fingerprint properties (time domain dominated), and (iii) based on a compromise between spatial  
6  
7 and temporal properties) selected the same component. When subsequently applied to a MCS  
8  
9 patient with a “functional hemispherectomy”, two out of three selection criteria were able to  
10  
11 detect the proper component. This suggests that a method with an automatic masking (in which a  
12  
13 growing number of nodes are repeatedly excluded from the network until the selected component  
14  
15 satisfies the DMN BOLD fingerprint constraints) could be a successful approach to select  
16  
17 components in highly pathological brains or in conditions where the network can possibly  
18  
19 become highly disconnected such as in pharmacological coma (Boveroux et al. 2010). Defining  
20  
21 scores that summarize both spatial and temporal fingerprint properties offers a good compromise  
22  
23 for DMN connectivity studies in clinical settings. When applied to a small cohort of VS patients  
24  
25 the presented methodology permitted to isolate the main sources of connectivity in the DMN  
26  
27 regions and, in our view, ruled out convincing neuronal contributions. Future studies should  
28  
29 validate these methodologies comparing their sensitivity on simulated data of pathological  
30  
31 brains. The robustness of the methodology was here illustrated by the study of two LIS patients  
32  
33 (showing important movement yet permitting extraction of near-normal DMN connectivity) and  
34  
35 of a MCS patient (showing a half functioning brain with similar results obtained by rsfMRI and  
36  
37 metabolic PET studies). The proposed approach can also be extended to other networks with or  
38  
39 without renouncing to the concept of anticorrelation-corrected connectivity in the assessment of  
40  
41 resting state fMRI in real-life clinical settings.  
42  
43  
44  
45  
46  
47  
48  
49  
50  
51  
52  
53  
54  
55  
56  
57  
58  
59  
60

## Appendix

### *Connectivity graph and anticorrelation-corrected number of edges*

To study connectivity between each pair of target points, we implemented a new method which is based on ICA followed by a General Linear Model (GLM). After running ICA with thirty components, we used the corresponding time courses to regress in the BOLD signal in each of the thirteen ROIs (average time course over the voxels belonging to the ROI). For each component we obtained thirteen parameter estimates (beta values) indicating the weight of each regressor and the corresponding T-values:

$$\begin{aligned}
 TC_{ROI_1} &= \beta_{0,1} + \beta_{1,1}TC_{IC_1} + \dots \dots \dots + \beta_{30,1}TC_{IC_{30}} + \varepsilon_{1,1} \\
 TC_{ROI_2} &= \beta_{0,2} + \beta_{1,2}TC_{IC_1} + \dots \dots \dots + \beta_{30,2}TC_{IC_{30}} + \varepsilon_{1,2} \\
 &\vdots \qquad \qquad \qquad \vdots \qquad \qquad \qquad \vdots \qquad \qquad \qquad \vdots \\
 TC_{ROI_n} &= \beta_{0,n} + \beta_{1,n}TC_{IC_1} + \dots \dots \dots + \beta_{30,n}TC_{IC_{30}} + \varepsilon_{1,n}
 \end{aligned}$$

$$T = \frac{c^T \cdot \beta}{\sqrt{\text{Var}(\varepsilon) * c^T \cdot (X^T X)^{-1} \cdot c}}$$

where  $c$  is the contrast vector which isolates each IC and  $X$  the matrix with the predictors  $TC_{IC}$ . The anticorrelation-corrected number of edges was obtained by multiplying the total number of edges of each graph by a weight “ $w$ ” which measures the anti-correlation of the DMN activity with the extrinsic system/external control network (ECN). The anticorrelation-corrected number of edges  $E_{AntiCC}$  was then defined in terms of the number of edges  $E$  as:

$$E_{AntiCC} = \frac{E}{2} * \left( 1 \pm \frac{\langle T_{extr} \rangle}{\max(|T_{extr}|)} \right) = E * w$$

where  $\langle T_{extr} \rangle$  is the average of the five extrinsic ROIs T-values,  $\max(|T_{extr}|)$  is the maximum of the absolute value of the five extrinsic ROIs T-values and  $\pm$  signs hold respectively for the ICs 1-30 (minus sign) and for ICs 31-60 (plus sign). The anti-correlation index would be close to 0 if the activity in the extrinsic network highly correlates with the activity in the intrinsic network ( $\langle T_{extr} \rangle / \max(|T_{extr}|)$  subtracts to 1), e.g. a global signal, and close to 1 if the activity in the extrinsic network is anti-correlated with the activity in the DMN ( $\langle T_{extr} \rangle / \max(|T_{extr}|)$  sums up to 1), e.g. the DMN component.

#### *Fingerprint and anticorrelation-corrected scores*

A fingerprint (as in De Martino, et al., 2007 the fingerprint reports normalized values respectively for: degree of clustering, skewness, kurtosis, spatial entropy as calculated from the distribution of the z values for the considered independent component and one lag autocorrelation, temporal entropy, and the power of the five frequency bands [0-0.008 Hz, 0.008-0.02 Hz, 0.02-0.05 Hz, 0.05-0.1 Hz, 0.1-0.25 Hz] as extracted from the time course of the considered IC) is calculated in Brain Voyager for each IC. As presented in the methods in order to drive the automatic masking or to build the anticorrelation-corrected scores a euclidean distance in the fingerprint space is defined as:

$$D_{IC} = \sqrt{(Cluster_{IC} - Cluster_{neur})^2 + (Skew_{IC} - Skew_{neur})^2 + (Kurt_{IC} - Kurt_{neur})^2 + (SpatEntr_{IC} - SpatEntr_{neur})^2 + (OneLagAC_{IC} - OneLagAC_{neur})^2 + (TempEntr_{IC} - TempEntr_{neur})^2 + (P(0 - 0.008Hz)_{IC} - P(0 - 0.008Hz)_{neur})^2 + (P(0.008 - 0.02Hz)_{IC} - P(0.008 - 0.02Hz)_{neur})^2 + (P(0.02 - 0.05Hz)_{IC} - P(0.02 - 0.05Hz)_{neur})^2 + (P(0.05 - 0.1Hz)_{IC} - P(0.05 - 0.1Hz)_{neur})^2 + (P(0.1 - 0.25Hz)_{IC} - P(0.1 - 0.25Hz)_{neur})^2}$$

using an average fingerprint with values “...<sub>neur</sub>” built from the DMN components of the eleven healthy subjects (group 1). The “anticorrelation-corrected score” was built by multiplying the number of anticorrelation-corrected edges by a new weight “ $w_F$ ” defined by:

$$w_F = \left( 1 - \frac{D_{IC}}{\max(D_{IC})} \right)$$

with  $w_F$  close to 0 for components which have a distance comparable with the  $\max(D_{IC})$  (“artifacts” components) and close to 1 for components with “neuronal” origin.

***Motion indices:***

Two motion indices were introduced describing the motion of patients compared to healthy controls. The first index  $\Delta$  measures the mean over time of the displacement during the full acquisition (translation measured in mm and rotations measured in degrees). The second index  $\Sigma$  measures the mean over time of the displacement speed (variation over a repetition time) during the full acquisition:

$$\Delta = \langle \sqrt{\text{Tra}X^2 + \text{Tra}Y^2 + \text{Tra}Z^2 + \text{Rot}X^2 + \text{Rot}Y^2 + \text{Rot}Z^2} \rangle$$

$$\Sigma = \langle \sqrt{\Delta_{TR}\text{Tra}X^2 + \Delta_{TR}\text{Tra}Y^2 + \Delta_{TR}\text{Tra}Z^2 + \Delta_{TR}\text{Rot}X^2 + \Delta_{TR}\text{Rot}Y^2 + \Delta_{TR}\text{Rot}Z^2} \rangle$$

where  $\Delta_{TR}$  indicates the variation of a parameter over a TR.

1  
2  
3 **Acknowledgments:** SL is Senior Research Associate; CP is Research Associate; AS, MB and  
4  
5 QN are Post-doctoral Fellows and MAB is Research Fellow at the Fonds de la Recherche  
6  
7 Scientifique (FRS). We thank D. Feyers and C. Bastin for acquisition and sharing of the eleven  
8  
9 healthy control data. This work was supported by Israel Science Foundation (160/07), Italian  
10  
11 Minerva grants, MIUR-Progetto FIRB Internazionalizzazione (RBIN04KW43), European  
12  
13 Commission (DISCOS-Marie Curie RTN, Mindbridge, DECODER, COST-CATIA), McDonnell  
14  
15 Foundation, Mind Science Foundation, FRS, Reine Elisabeth Medical Foundation and University  
16  
17 of Liège and the European Space Agency.  
18  
19  
20  
21  
22  
23  
24  
25  
26  
27  
28  
29  
30  
31  
32  
33  
34  
35  
36  
37  
38  
39  
40  
41  
42  
43  
44  
45  
46  
47  
48  
49  
50  
51  
52  
53  
54  
55  
56  
57  
58  
59  
60



**References**

- 1  
2  
3  
4  
5  
6 Alkire MT, & Miller, J (2005): General anesthesia and the neural correlates of consciousness.  
7  
8 Prog Brain Res 150: 229-244.  
9
- 10 American Congress of Rehabilitation Medicine (1995): Recommendations for use of uniform  
11  
12 nomenclature pertinent to patients with severe alterations in consciousness. . Arch Phys  
13  
14 Med Rehabil 76: 205-209.  
15
- 16  
17 Anand A, Li, Y, Wang, Y, Wu, J, Gao, S, Bukhari, L, et al. (2005): Activity and connectivity of  
18  
19 brain mood regulating circuit in depression: a functional magnetic resonance study. Biol  
20  
21 Psychiatry 57: 1079-1088.  
22  
23
- 24 Baars BJ, Ramsoy, TZ, & Laureys, S (2003): Brain, conscious experience and the observing self.  
25  
26 Trends Neurosci 26: 671-675.  
27  
28
- 29 Beckmann CF, DeLuca, M, Devlin, JT, & Smith, SM (2005): Investigations into resting-state  
30  
31 connectivity using independent component analysis. Philos Trans R Soc Lond B Biol Sci  
32  
33 360: 1001-1013.  
34  
35
- 36 Birn RM, Murphy, K, & Bandettini, PA (2008): The effect of respiration variations on  
37  
38 independent component analysis results of resting state functional connectivity. Hum  
39  
40 Brain Mapp 29: 740-750.  
41  
42
- 43 Biswal B, Yetkin, FZ, Haughton, VM, & Hyde, JS (1995): Functional connectivity in the motor  
44  
45 cortex of resting human brain using echo-planar MRI. Magn Reson Med 34: 537-541.  
46  
47
- 48 Boly M, Phillips, C, Balteau, E, Schnakers, C, Degueldre, C, Moonen, G, et al. (2008):  
49  
50 Consciousness and cerebral baseline activity fluctuations. Hum Brain Mapp 29: 868-874.  
51  
52  
53  
54  
55  
56  
57  
58  
59  
60

- 1  
2  
3 Boly M, Tshibanda, L, Vanhaudenhuyse, A, Noirhomme, Q, Schnakers, C, Ledoux, D, et al.  
4  
5 (2009): Functional connectivity in the default network during resting state is preserved in  
6  
7 a vegetative but not in a brain dead patient. *Hum Brain Mapp.*  
8  
9
- 10 Born JD, Albert, A, Hans, P, & Bonnal, J (1985): Relative prognostic value of best motor  
11  
12 response and brain stem reflexes in patients with severe head injury. *Neurosurgery* 16:  
13  
14 595-601.  
15  
16
- 17 Boveroux P, Vanhaudenhuyse, A, Bruno, MA, Noirhomme, Q, Lauwick, S, Luxen, A, et al. (in  
18  
19 press): Breakdown of within- and between-network resting state functional magnetic  
20  
21 resonance imaging connectivity during propofol-induced loss of consciousness.  
22  
23 *Anesthesiology.*  
24  
25
- 26 Calhoun VD, Eichele, T, & Pearlson, G (2009): Functional brain networks in schizophrenia: a  
27  
28 review. *Front Hum Neurosci* 3: 17.  
29  
30
- 31 Cole DM, Smith SM, Beckmann CF (2010) Advances and pitfalls in the analysis and  
32  
33 interpretation of resting-state fMRI data. *Front Syst Neurosci.* 4:8  
34  
35
- 36 Cordes D, Haughton, VM, Arfanakis, K, Carew, JD, Turski, PA, Moritz, CH, et al. (2001):  
37  
38 Frequencies contributing to functional connectivity in the cerebral cortex in "resting-  
39  
40 state" data. *AJNR Am J Neuroradiol* 22: 1326-1333.  
41  
42
- 43 Cordes D, Haughton, VM, Arfanakis, K, Wendt, GJ, Turski, PA, Moritz, CH, et al. (2000):  
44  
45 Mapping functionally related regions of brain with functional connectivity MR imaging.  
46  
47 *AJNR Am J Neuroradiol* 21: 1636-1644.  
48  
49
- 50 Dai W, Carmichael OT, Lopez OL, Becker JT, Kuller LH, Gach HM (2008): Effects of image  
51  
52 normalization on the statistical analysis of perfusion MRI in elderly brains. *J Magn Reson*  
53  
54 *Imaging* 28(6): 1351-60.  
55  
56  
57  
58  
59  
60

- 1  
2  
3 Damoiseaux JS, Rombouts, SA, Barkhof, F, Scheltens, P, Stam, CJ, Smith, SM, et al. (2006):  
4  
5 Consistent resting-state networks across healthy subjects. *Proc Natl Acad Sci U S A* 103:  
6  
7 13848-13853.  
8  
9
- 10 De Luca M, Beckmann, CF, De Stefano, N, Matthews, PM, & Smith, SM (2006): fMRI resting  
11  
12 state networks define distinct modes of long-distance interactions in the human brain.  
13  
14 *Neuroimage* 29: 1359-1367.  
15  
16
- 17 De Martino F, Gentile, F, Esposito, F, Balsi, M, Di Salle, F, Goebel, R, et al. (2007):  
18  
19 Classification of fMRI independent components using IC-fingerprints and support vector  
20  
21 machine classifiers. *Neuroimage* 34: 177-194.  
22  
23
- 24 Esposito F, Aragri, A, Pesaresi, I, Cirillo, S, Tedeschi, G, Marciano, E, et al. (2008): Independent  
25  
26 component model of the default-mode brain function: combining individual-level and  
27  
28 population-level analyses in resting-state fMRI. *Magn Reson Imaging* 26: 905-913.  
29  
30
- 31 Esposito F, Scarabino, T, Hyvarinen, A, Himberg, J, Formisano, E, Comani, S, et al. (2005):  
32  
33 Independent component analysis of fMRI group studies by self-organizing clustering.  
34  
35 *Neuroimage* 25: 193-205.  
36  
37
- 38 Fair DA, Cohen, AL, Dosenbach, NU, Church, JA, Miezin, FM, Barch, DM, et al. (2008): The  
39  
40 maturing architecture of the brain's default network. *Proc Natl Acad Sci U S A* 105:  
41  
42 4028-4032.  
43  
44
- 45 Formisano E, Esposito, F, Di Salle, F, & Goebel, R (2004): Cortex-based independent  
46  
47 component analysis of fMRI time series. *Magn Reson Imaging* 22: 1493-1504.  
48  
49
- 50 Fox MD, & Raichle, ME (2007): Spontaneous fluctuations in brain activity observed with  
51  
52 functional magnetic resonance imaging. *Nat Rev Neurosci* 8: 700-711.  
53  
54  
55  
56  
57  
58  
59  
60

1  
2  
3 Fox MD, Snyder, AZ, Vincent, JL, Corbetta, M, Van Essen, DC, & Raichle, ME (2005): The  
4  
5 human brain is intrinsically organized into dynamic, anticorrelated functional networks.  
6  
7 Proc Natl Acad Sci U S A 102: 9673-9678.  
8  
9

10 Fox MD, Zhang, D, Snyder, AZ, & Raichle, ME (2009): The Global Signal and Observed  
11  
12 Anticorrelated Resting State Brain Networks. J Neurophysiol.  
13  
14

15 Giacino JT, Kalmar, K, & Whyte, J (2004): The JFK Coma Recovery Scale-Revised:  
16  
17 measurement characteristics and diagnostic utility. Arch Phys Med Rehabil 85: 2020-  
18  
19 2029.  
20  
21

22 Golland Y, Bentin, S, Gelbard, H, Benjamini, Y, Heller, R, Nir, Y, et al. (2007): Extrinsic and  
23  
24 intrinsic systems in the posterior cortex of the human brain revealed during natural  
25  
26 sensory stimulation. Cereb Cortex 17: 766-777.  
27  
28

29 Golland Y, Golland, P, Bentin, S, & Malach, R (2008): Data-driven clustering reveals a  
30  
31 fundamental subdivision of the human cortex into two global systems. Neuropsychologia  
32  
33 46: 540-553.  
34  
35

36 Gray MA, Minati, L, Harrison, NA, Gianaros, PJ, Napadow, V, & Critchley, HD (2009):  
37  
38 Physiological recordings: basic concepts and implementation during functional magnetic  
39  
40 resonance imaging. Neuroimage 47: 1105-1115.  
41  
42

43 Greicius MD, Krasnow, B, Reiss, AL, & Menon, V (2003): Functional connectivity in the resting  
44  
45 brain: a network analysis of the default mode hypothesis. Proc Natl Acad Sci U S A 100:  
46  
47 253-258.  
48  
49

50 Greicius MD, & Menon, V (2004): Default-mode activity during a passive sensory task:  
51  
52 uncoupled from deactivation but impacting activation. J Cogn Neurosci 16: 1484-1492.  
53  
54  
55  
56  
57  
58  
59  
60

- 1  
2  
3 Greicius MD, Srivastava, G, Reiss, AL, & Menon, V (2004): Default-mode network activity  
4 distinguishes Alzheimer's disease from healthy aging: evidence from functional MRI.  
5 Proc Natl Acad Sci U S A 101: 4637-4642.  
6  
7  
8  
9  
10 Gusnard DA, Akbudak, E, Shulman, GL, & Raichle, ME (2001): Medial prefrontal cortex and  
11 self-referential mental activity: relation to a default mode of brain function. Proc Natl  
12 Acad Sci U S A 98: 4259-4264.  
13  
14  
15  
16  
17 Haggmann P, Cammoun, L, Gigandet, X, Meuli, R, Honey, CJ, Wedeen, VJ, et al. (2008):  
18 Mapping the structural core of human cerebral cortex. PLoS Biol 6: e159.  
19  
20  
21  
22 Hyvarinen A, Karhunen, J, & Oja, E. (2001). Independent Component Analysis.  
23  
24  
25 Jafri MJ, Pearlson GD, Stevens M, Calhoun VD (2008): A method for functional network  
26 connectivity among spatially independent resting-state components in schizophrenia.  
27 Neuroimage 39:1666-81.  
28  
29  
30  
31 Kennedy DP, Redcay, E, & Courchesne, E (2006): Failing to deactivate: resting functional  
32 abnormalities in autism. Proc Natl Acad Sci U S A 103: 8275-8280.  
33  
34  
35  
36 Kiviniemi V, Kantola JH, Jauhiainen J, Hyvärinen A, & Tervonen O. (2003): Independent component  
37 analysis of nondeterministic fMRI signal sources. Neuroimage 19, 253-60.  
38  
39  
40 Kiviniemi V, Starck T, Remes J, Long X, Nikkinen J, Haapea M, et al. (2009). Functional segmentation  
41 of the brain cortex using high model order group PICA. Hum. Brain Mapp. 30, 3865–3886.  
42  
43  
44 Koch W, Teipel S, Mueller S, Buerger K, Bokde AL, Hampel H, et al. (2010): Effects of aging on default  
45 mode network activity in resting state fMRI: does the method of analysis matter? Neuroimage 15:  
46 280-7.  
47  
48  
49  
50  
51 Laureys S, Owen, AM, & Schiff, ND (2004): Brain function in coma, vegetative state, and  
52 related disorders. Lancet Neurol 3: 537-546.  
53  
54  
55  
56  
57  
58  
59  
60

- 1  
2  
3 Laureys S, Perrin, F, & Bredart, S (2007): Self-consciousness in non-communicative patients.  
4  
5 Conscious Cogn 16: 722-741; discussion 742-725.  
6  
7  
8 Lowe MJ, Mock, BJ, & Sorenson, JA (1998): Functional connectivity in single and multislice  
9  
10 echoplanar imaging using resting-state fluctuations. Neuroimage 7: 119-132.  
11  
12 Lowe MJ, Phillips, MD, Lurito, JT, Mattson, D, Dzemidzic, M, & Mathews, VP (2002):  
13  
14 Multiple sclerosis: low-frequency temporal blood oxygen level-dependent fluctuations  
15  
16 indicate reduced functional connectivity initial results. Radiology 224: 184-192.  
17  
18  
19 Maquet P (1997): Positron emission tomography studies of sleep and sleep disorders. J Neurol  
20  
21 244: S23-28.  
22  
23  
24 McKeown MJ, Makeig, S, Brown, GG, Jung, TP, Kindermann, SS, Bell, AJ, et al. (1998):  
25  
26 Analysis of fMRI data by blind separation into independent spatial components. Hum  
27  
28 Brain Mapp 6: 160-188.  
29  
30  
31 Meindl T, Teipel S, Elmouden R, Mueller S, Koch W, Dietrich O, et al. (2010): Test-retest  
32  
33 reproducibility of the default-mode network in healthy individuals. Hum Brain Mapp 31:  
34  
35 237-46.  
36  
37  
38 Minoshima S, Giordani, B, Berent, S, Frey, KA, Foster, NL, & Kuhl, DE (1997): Metabolic  
39  
40 reduction in the posterior cingulate cortex in very early Alzheimer's disease. Ann Neurol  
41  
42 42: 85-94.  
43  
44  
45 Mitra PP, Ogawa, S, Hu, X, & Ugurbil, K (1997): The nature of spatiotemporal changes in  
46  
47 cerebral hemodynamics as manifested in functional magnetic resonance imaging. Magn  
48  
49 Reson Med 37: 511-518.  
50  
51  
52  
53  
54  
55  
56  
57  
58  
59  
60

- 1  
2  
3  
4  
5  
6  
7  
8  
9  
10  
11  
12  
13  
14  
15  
16  
17  
18  
19  
20  
21  
22  
23  
24  
25  
26  
27  
28  
29  
30  
31  
32  
33  
34  
35  
36  
37  
38  
39  
40  
41  
42  
43  
44  
45  
46  
47  
48  
49  
50  
51  
52  
53  
54  
55  
56  
57  
58  
59  
60
- Murphy K, Birn, RM, Handwerker, DA, Jones, TB, & Bandettini, PA (2009): The impact of global signal regression on resting state correlations: are anti-correlated networks introduced? *Neuroimage* 44: 893-905.
- Nir Y, Hasson, U, Levy, I, Yeshurun, Y, & Malach, R (2006): Widespread functional connectivity and fMRI fluctuations in human visual cortex in the absence of visual stimulation. *Neuroimage* 30: 1313-1324.
- Nir Y, Mukamel, R, Dinstein, I, Privman, E, Harel, M, Fisch, L, et al. (2008): Interhemispheric correlations of slow spontaneous neuronal fluctuations revealed in human sensory cortex. *Nat Neurosci* 11: 1100-1108.
- Perlberg V, Bellec, P, Anton, JL, Pelegrini-Issac, M, Doyon, J, & Benali, H (2007): CORSICA: correction of structured noise in fMRI by automatic identification of ICA components. *Magn Reson Imaging* 25: 35-46.
- Perlberg V, & Marrelec, G (2008): Contribution of Exploratory Methods to the Investigation of Extended Large-Scale Brain Networks in Functional MRI: Methodologies, Results, and Challenges. *Int J Biomed Imaging* 2008: 218519.
- Rainville P, Hofbauer, RK, Bushnell, MC, Duncan, GH, & Price, DD (2002): Hypnosis modulates activity in brain structures involved in the regulation of consciousness. *J Cogn Neurosci* 14: 887-901.
- Schilbach L, Eickhoff, SB, Rotarska-Jagiela, A, Fink, GR, & Vogeley, K (2008): Minds at rest? Social cognition as the default mode of cognizing and its putative relationship to the "default system" of the brain. *Conscious Cogn* 17: 457-467.

- 1  
2  
3 Smith SM, Fox PT, Miller KL, Glahn DC, Fox PM, Mackay CE, et al. (2009). Correspondence  
4 of the brain's functional architecture during activation and rest. *Proc. Natl. Acad. Sci.*  
5 U.S.A. 106, 13040–13045.  
6  
7  
8  
9  
10 Soddu A, Vanhaudenhuyse A, Demertzi A, Bruno MA, Tshibanda L, Haibo Di et al. (in press).  
11 Resting state activity in patients with disorders of consciousness. *Funct Neurol.*  
12  
13 The Multi-Society Task Force on PVS (1994): Medical aspects of the persistent vegetative state  
14 (1). *N Engl J Med* 330: 1499-1508.  
15  
16  
17  
18  
19 Vanhaudenhuyse A, Demertzi, A, Schabus, M, Noirhomme, Q, Bredart, S, Boly, M, et al.  
20 (2010): Two distinct neuronal networks mediate the awareness of environment and of  
21 self. *J Cogn Neurosci.*  
22  
23  
24  
25  
26  
27 Vanhaudenhuyse A, Noirhomme, Q, Tshibanda, LJ, Bruno, MA, Boveroux, P, Schnakers, C, et  
28 al. (2010): Default network connectivity reflects the level of consciousness in non-  
29 communicative brain-damaged patients. *Brain* 133: 161-171.  
30  
31  
32  
33  
34 Vincent JL, Patel, GH, Fox, MD, Snyder, AZ, Baker, JT, Van Essen, DC, et al. (2007): Intrinsic  
35 functional architecture in the anaesthetized monkey brain. *Nature* 447: 83-86.  
36  
37  
38  
39 Weissman-Fogel I, Moayed M, Taylor KS, Pope G, Davis KD (2010): Cognitive and default-  
40 mode resting state networks: do male and female brains "rest" differently? *Hum Brain*  
41 *Mapp* 31(11): 1713-26.  
42  
43  
44  
45  
46 Xiong J, Parsons, LM, Gao, JH, & Fox, PT (1999): Interregional connectivity to primary motor  
47 cortex revealed using MRI resting state images. *Hum Brain Mapp* 8: 151-156.  
48  
49  
50  
51 Yang H, Long, XY, Yang, Y, Yan, H, Zhu, CZ, Zhou, XP, et al. (2007): Amplitude of low  
52 frequency fluctuation within visual areas revealed by resting-state functional MRI.  
53 *Neuroimage* 36: 144-152.  
54  
55  
56  
57  
58  
59  
60



1  
2  
3 Ylipaavalniemi J, & Vigario, R (2008): Analyzing consistency of independent components: an  
4  
5 fMRI illustration. Neuroimage 39: 169-180.  
6  
7  
8  
9  
10  
11  
12  
13  
14  
15  
16  
17  
18  
19  
20  
21  
22  
23  
24  
25  
26  
27  
28  
29  
30  
31  
32  
33  
34  
35  
36  
37  
38  
39  
40  
41  
42  
43  
44  
45  
46  
47  
48  
49  
50  
51  
52  
53  
54  
55  
56  
57  
58  
59  
60

For Peer Review

**Table 1.** Patients' demographic, clinical and structural imaging data.

1  
2  
3  
4  
5  
6  
7  
8  
9  
10  
11  
12  
13  
14  
15  
16  
17  
18  
19  
20  
21  
22  
23  
24  
25  
26  
27  
28  
29  
30  
31  
32  
33  
34  
35  
36  
37  
38  
39  
40  
41  
42  
43  
44  
45  
46  
47  
48  
49

|                                  | VS1                  | VS2            | VS3            | VS4            | VS5                     | VS6       | VS7            | VS8            | MCS            | LIS 1            | LIS 2      |
|----------------------------------|----------------------|----------------|----------------|----------------|-------------------------|-----------|----------------|----------------|----------------|------------------|------------|
| Gender (age, years)              | Male (62)            | Male (21)      | Male (16)      | Female (69)    | Male (82)               | Male (87) | Male (38)      | Male (63)      | Male (24)      | Female (24)      | Male (20)  |
| Etiology                         | Brainstem hemorrhage | Trauma         | Trauma         | Anoxia         | Vascular encephalopathy | Trauma    | Anoxia         | Anoxia         | Trauma         | Brainstem stroke | Trauma     |
| Time of fMRI (days after insult) | 32                   | 170            | 615            | 61             | 26                      | 7         | 282            | 29             | 301            | 850              | 1475       |
| Outcome at 12 months             | Dead                 | VS             | VS             | VS             | Dead                    | Dead      | VS             | MCS            | Still MCS      | LIS              | LIS        |
| Auditory                         | None                 | Startle reflex | Startle reflex | Startle reflex | None                    | None      | Startle reflex | Startle reflex | Startle reflex | Consistent       | Consistent |

1  
2  
3  
4  
5  
6  
7  
8  
9  
10  
11  
12  
13  
14  
15  
16  
17  
18  
19  
20  
21  
22  
23  
24  
25  
26  
27  
28  
29  
30  
31  
32  
33  
34  
35  
36  
37  
38  
39  
40  
41  
42  
43  
44  
45  
46  
47  
48  
49

|                            |                                          |                                                   |                                                                  |                                         |                                          |                                                     |                                      |                                      |                                          |                                |                                              |
|----------------------------|------------------------------------------|---------------------------------------------------|------------------------------------------------------------------|-----------------------------------------|------------------------------------------|-----------------------------------------------------|--------------------------------------|--------------------------------------|------------------------------------------|--------------------------------|----------------------------------------------|
| function*                  |                                          |                                                   |                                                                  |                                         |                                          |                                                     |                                      |                                      |                                          | movement to command            | movement to command                          |
| Visual function*           | Blink to threat                          | None                                              | None                                                             | None                                    | None                                     | None                                                | None                                 | Blink to threat                      | Visual poursuit                          | Object recognition             | Object recognition                           |
| Motor function*            | Flexion to pain                          | Abnormal posturing                                | Abnormal posturing                                               | Flexion to pain                         | Flexion to pain                          | Flexion to pain                                     | Abnormal posturing                   | Flexion to pain                      | Flexion to pain                          | Flexion to pain                | Flexion to pain                              |
| Verbal/Oro motor function* | None                                     | Oral reflexes                                     | Vocalization                                                     | Oral reflexes                           | Oral reflexes                            | Oral reflexes                                       | Oral reflexes                        | Vocalization                         | Oral reflexes                            | Oral Movement                  | Vocalization                                 |
| Communication*             | None                                     | None                                              | None                                                             | None                                    | None                                     | None                                                | None                                 | None                                 | None                                     | Functional accurate            | Functional accurate                          |
| Arousal*                   | Without stimulation                      | Without stimulation                               | Without stimulation                                              | With stimulation                        | With stimulation                         | With stimulation                                    | With stimulation                     | Without stimulation                  | Without stimulation                      | Attention                      | Attention                                    |
| EEG background activity    | Diffuse theta-delta,                     | Right-lateralized theta-delta, non reactive       | Irregular diffuse theta-delta                                    | Left lateralized diffuse theta-delta    | Symmetric theta-delta, non-reactive      | Irregular diffuse theta-delta, non-reactive ,       | Left-lateralized theta, non reactive | Diffuse theta-delta, non-reactive    | Not available                            | Diffuse theta, transient delta | Not available                                |
| Lesions on structural MRI  | Pontine hemorrhage extending to midbrain | Diffuse axonal injury Bilateral sub-dural frontal | Diffuse atrophy with secondary hydro-cephalus. Bilateral lesions | Diffuse bilateral white matter atrophy, | Diffuse cortical and subcortical atrophy | Subarachnoid hemorrhage, brainstem, left lenticular | Diffuse white matter lesions         | Posterior occipito-parietal ischemia | Corpus callosum, left thalamus, pontine, | Centro-protuberential lesion   | Pontine, midbrain, cerebellum, left thalamus |

1  
2  
3  
4  
5  
6  
7  
8  
9  
10  
11  
12  
13  
14  
15  
16  
17  
18  
19  
20  
21  
22  
23  
24  
25  
26  
27  
28  
29  
30  
31  
32  
33  
34  
35  
36  
37  
38  
39  
40  
41  
42  
43  
44  
45  
46  
47  
48  
49

|  |  |          |                                                                                  |                                                              |                                                           |                                                                         |  |  |                                              |  |         |
|--|--|----------|----------------------------------------------------------------------------------|--------------------------------------------------------------|-----------------------------------------------------------|-------------------------------------------------------------------------|--|--|----------------------------------------------|--|---------|
|  |  | hygroma. | of lenticular<br>nucleus<br>thalamus, and<br>para-<br>hippocampal<br>structures. | caudate,<br>thalamus, and<br>para-<br>hippocampal<br>lesions | Bilateral basal<br>ganglia and<br>white matter<br>lesions | nucleus,<br>temporal and<br>multifocal<br>fronto-parietal<br>contusions |  |  | bilateral<br>fronto-<br>parietal<br>lesions. |  | lesions |
|--|--|----------|----------------------------------------------------------------------------------|--------------------------------------------------------------|-----------------------------------------------------------|-------------------------------------------------------------------------|--|--|----------------------------------------------|--|---------|

VS = vegetative state; LIS = locked-in syndrome; MCS=minimally conscious state. \*based on Coma Recovery Score-Revised assessment.

1  
2  
3  
4  
5  
6 **Figure 1.** Illustration of the Default Mode selection method in a minimally conscious state  
7 patient. a) Selection of the IC corresponding to the graph with the highest number of edges. b)  
8 Selection of the IC corresponding to the graph with the highest number of global edges (to select  
9 the global signal IC). c) Selection of the IC corresponding to the graph with the highest number  
10 of anticorrelation-corrected edges. d) Selection of the IC corresponding to the graph with the  
11 highest anticorrelation-corrected score. Right panel: a) number of edges, b) number of global  
12 edges, c) number of anticorrelation-corrected edges and d) anticorrelation-corrected score of  
13 each graph vs. the corresponding IC number. Middle panel: spatial map of the selected IC. Left  
14 panel: connectivity graph of the selected IC. MFv=medial prefrontal cortex ventral, MFa=medial  
15 prefrontal cortex anterior, pC=posterior cingulate/precuneus, pP=posterior parietal lobe,  
16 sF=superior frontal gyrus, aT=middle temporal gyrus anterior,  
17 mT=parahippocampal/mesiotemporal, T=thalamus. Left is right side of brain.  
18  
19  
20  
21  
22  
23  
24  
25  
26  
27  
28  
29  
30  
31  
32  
33  
34  
35

36 **Figure 2.** Flow chart illustrating the second selection criterion. Arrow indicates the starting point  
37 in the flow chart. Different color boxes indicate the different steps.  
38  
39  
40  
41  
42

43 **Figure 3.** Upper part: Random effect group analyses identifying the Default Mode network  
44 (DMN) in 8 healthy controls and 8 patients in a vegetative state (VS). Results are thresholded at  
45 false discovery rate corrected  $p < 0.05$  with a mask given by the black and white contour regions  
46 showing the DMN from an independent dataset (n=11 healthy controls, group 1). Lower part:  
47 Graphical representation (i.e, fingerprint; normalized values) of DMN temporal properties (5  
48 frequency bands, temporal entropy and one-lag autocorrelation) and spatial properties (spatial  
49  
50  
51  
52  
53  
54  
55  
56  
57  
58  
59  
60

1  
2  
3 entropy, skewness, kurtosis and clustering) in healthy controls (mean (yellow) and SD (green))  
4  
5 and in VS patients (mean (cyan) and SD (blue)).  
6  
7  
8  
9

10 **Figure 4.** Connectivity graphs for the 8 healthy controls and the 8 VS patients' groups and  
11 between-group differences. Red (blue), orange (cyan) and yellow (green) lines represent  $p=0.05$ ,  
12  $p=0.01$  and  $p=0.001$  respectively for positive and negative differences. Thicker lines are  
13 connections surviving correction for multiple comparisons. Nodes are defined as for figure 1.  
14  
15  
16  
17  
18  
19

20  
21  
22 **Figure 5.** Single subject analyses identifying the default mode network (DMN) and connectivity  
23 graphs in (a) a representative healthy control, (b-c) LIS patients 1-2, (d) MCS patient. Positive  
24 correlations (yellow) and anti-correlations (blue) with the DM time course shown on a transverse  
25 section at  $Z=24$  mm (thresholded at corrected  $p<0.05$ ). Black and white contour regions show the  
26 DMN from an independent dataset of 11 healthy controls. Motion curves illustrate translation (in  
27 mm) for x (red), y (green) and z (blue) and rotation (in  $^{\circ}$ ) for pitch (yellow), roll (purple) and  
28 yaw (cyan) parameters, and the DMN time course illustrates the normalized BOLD signal over  
29 600s. The fingerprint summarizes the DMN temporal and spatial properties for each subject (red)  
30 superimposed to the control data of 8 healthy subjects (mean in yellow and standard deviation in  
31 green). The connectivity graph illustrates the connections between the 13 selected DM nodes at  
32 different thresholds for significance (thick lines "weighted edges" are corrected for external  
33 network anti-correlations). Nodes are defined as for figure 1.  
34  
35  
36  
37  
38  
39  
40  
41  
42  
43  
44  
45  
46  
47  
48  
49  
50  
51  
52

53 **Figure 6.** Single subject analyses identifying the Default Mode network (DMN) and connectivity  
54 graphs in (a-d) VS patients 1-4. See figure 5 for explanatory legend.  
55  
56  
57  
58  
59  
60

1  
2  
3  
4  
5  
6 **Figure 7.** Single subject analyses identifying the Default Mode network (DMN) and connectivity  
7  
8 graphs in (a-d) VS patients 5-8. See figure 5 for explanatory legend.  
9  
10  
11  
12  
13  
14  
15  
16  
17  
18  
19  
20  
21  
22  
23  
24  
25  
26  
27  
28  
29  
30  
31  
32  
33  
34  
35  
36  
37  
38  
39  
40  
41  
42  
43  
44  
45  
46  
47  
48  
49  
50  
51  
52  
53  
54  
55  
56  
57  
58  
59  
60

For Peer Review

1  
2  
3  
4  
5  
6  
7  
8  
9  
10  
11  
12  
13  
14  
15  
16  
17  
18  
19  
20  
21  
22  
23  
24  
25  
26  
27  
28  
29  
30  
31  
32  
33  
34  
35  
36  
37  
38  
39  
40  
41  
42  
43  
44  
45  
46  
47  
48  
49

**Supplementary material**

**Table 1.** Comparison of default mode network selection methods applied to 10 healthy controls (preprocessing and ICA were performed in Brain Voyager and our three selection criteria were compared to self-organizing ICA). The variables reported are the number of edges (E), the anti-correlation index  $w = E_{AntiCC}/E$ , the anticorrelation-corrected number of edges ( $E_{AntiCC}$ ), the weighted number of edges ( $E_w$ ), the anticorrelation-corrected score ( $S_{AntiCC}$ ) and the weight  $w_F$  for the three selection criteria: 1<sup>st</sup> (init), 2<sup>nd</sup> (fin), 3<sup>rd</sup> ( $S_{AntiCC}$  max). When the three selection criteria selected the same component a single value for each of the six variables was presented. On the contrary, when at least two selection criteria selected different components, all the three values for each of the six variables were presented. A component indicated by “(-) n” in Self-organizing ICA is the same component as “30+n” for our three selection criteria.

|                                     |  |  |  |  |  |                     |
|-------------------------------------|--|--|--|--|--|---------------------|
| Brain Voyager (Preprocessing + ICA) |  |  |  |  |  |                     |
| Presented method                    |  |  |  |  |  | Self-organizing ICA |
|                                     |  |  |  |  |  |                     |



Soddu 47

|                     | $E(E_{AntiCC\ init})$ | $w(E_{AntiCC\ init})$ | $[ E_{AntiCC\ init}, E_W\ init] (IC)$                           | $S_{AntiCC} (E_{AntiCC\ init}) (IC)$ | $w_F(E_{AntiCC\ init})$ |                  |
|---------------------|-----------------------|-----------------------|-----------------------------------------------------------------|--------------------------------------|-------------------------|------------------|
|                     | $E(E_{AntiCC\ fin})$  | $w(E_{AntiCC\ fin})$  | $[ E_{AntiCC\ fin}, E_W\ fin] (IC)$                             | $S_{AntiCC} (E_{AntiCC\ fin}) (IC)$  | $w_F(E_{AntiCC\ fin})$  | $SIM (IC)$       |
|                     | $E(S_{AntiCC\ max})$  | $w(S_{AntiCC\ max})$  | $[ E_{AntiCC} ( S_{AntiCC\ max} ), E_W( S_{AntiCC\ max})] (IC)$ | $S_{AntiCC\ max} (IC)$               | $w_F(S_{AntiCC\ max})$  |                  |
| CTR 1               | 45                    | 0.85                  | [38.1 , 36] (48)                                                | 15.7 (48)                            | 0.41                    | (-) 0.64 (18)    |
| CTR 2               | 55                    | 0.72                  | [39.3 , 45] (46)                                                | 29.0 (46)                            | 0.74                    | (-) 0.54 (16)    |
| CTR 3               | 55                    | 0.82                  | [45.3 , 55] (8)                                                 | 38.6 (8)                             | 0.85                    | (+) 0.64 (8)     |
| CTR 4               | 66                    | 0.74                  | [48.6 , 36] (47)                                                | 32.2 (47)                            | 0.66                    | (-) 0.64 (17)    |
| CTR 5               | 45                    | 0.78                  | [32.2 , 36] (12)                                                | 23.9 (12)                            | 0.74                    | (+) 0.60 (12)    |
| CTR 6               | 78                    | 0.68                  | [53.2 , 45] (13)                                                | 42.5 (13)                            | 0.80                    | (+) 0.58 (13)    |
| CTR 7               | 45                    | 0.86                  | [38.6 , 29] (20)                                                | 18.3 (20)                            | 0.47                    | (+) 0.43 (20)    |
| CTR 8               | 55                    | 0.77                  | [42.2 , 45] (40)                                                | 32.0 (40)                            | 0.76                    | (-) 0.63 (10)    |
| CTR 9               | 36                    | 0.69                  | [24.7, 10] (19)                                                 | 17.5 (19)                            | 0.71                    | (+) 0.59 (19)    |
| CTR 10              | 45                    | 0.47                  | [21.3 , 10] (43)                                                | 12.3 (43)                            | 0.58                    | (-) 0.63 (13)    |
| <b>Average ± SD</b> | <b>53±12</b>          | <b>0.74±0.11</b>      | <b>[38.4±10.0, 35±15]</b>                                       | <b>26.2±10.2</b>                     | <b>0.67±0.14</b>        | <b>0.59±0.07</b> |

**Table 2.** Different default mode selection methods applied to the population of 8 healthy controls, 2 locked-in syndrome, 1 minimally conscious state and 8 vegetative state patients. See table 2 for explanations.

| Brain Voyager (Preprocessing + ICA) |                       |                       |                                                                 |                                      |                         |                     |
|-------------------------------------|-----------------------|-----------------------|-----------------------------------------------------------------|--------------------------------------|-------------------------|---------------------|
| Presented method                    |                       |                       |                                                                 |                                      |                         | Self-organizing ICA |
|                                     | $E(E_{AntiCC\ init})$ | $w(E_{AntiCC\ init})$ | $[ E_{AntiCC\ init}, E_W\ init] (IC)$                           | $S_{AntiCC} (E_{AntiCC\ init}) (IC)$ | $w_F(E_{AntiCC\ init})$ | <i>SIM</i> (IC)     |
|                                     | $E(E_{AntiCC\ fin})$  | $w(E_{AntiCC\ fin})$  | $[ E_{AntiCC\ fin}, E_W\ fin] (IC)$                             | $S_{AntiCC} (E_{AntiCC\ fin}) (IC)$  | $w_F(E_{AntiCC\ fin})$  |                     |
|                                     | $E(S_{AntiCC\ max})$  | $w(S_{AntiCC\ max})$  | $[ E_{AntiCC} ( S_{AntiCC\ max} ), E_W( S_{AntiCC\ max})] (IC)$ | $S_{AntiCC\ max} (IC)$               | $w_F(S_{AntiCC\ max})$  |                     |
| CTR 1                               | 66                    | 0.83                  | [53.5, 29] (15)                                                 | 37.5 (15)                            | 0.70                    | (+) 0.59 (15)       |
| CTR 2                               | 21                    | 0.67                  | [14.1, 4] (46)                                                  | 6.9 (46)                             | 0.49                    | (+) 0.47 (12)       |
| CTR 3                               | 36                    | 0.77                  | [27.3, 21] (48)                                                 | 12.7 (48)                            | 0.47                    | (-) 0.48 (18)       |

|                             |              |                  |                           |                 |                  |                  |
|-----------------------------|--------------|------------------|---------------------------|-----------------|------------------|------------------|
| CTR 4                       | 45           | 0.72             | [32.5, 28] (16)           | 25.2 (16)       | 0.78             | (+) 0.64 (16)    |
| CTR 5                       | 36           | 0.70             | [25.2, 10] (10)           | 20.7 (10)       | 0.82             | (+) 0.50 (10)    |
| CTR 6                       | 45           | 0.55             | [24.9, 11] (52)           | 20.9 (52)       | 0.84             | (-) 0.51 (22)    |
| CTR 7                       | 45           | 0.82             | [37.0, 28] (16)           | 25.5 (16)       | 0.69             | (+) 0.61 (16)    |
| CTR 8                       | 36           | 0.69             | [25.0, 11] (22)           | 16.8 (22)       | 0.67             | (+) 0.54 (12)    |
| <b>CTR<br/>Average ± SD</b> | <b>41±13</b> | <b>0.72±0.09</b> | <b>[29.9±11.6, 18±10]</b> | <b>20.8±9.2</b> | <b>0.68±0.14</b> | <b>0.54±0.06</b> |
| LIS 1                       | 28           | 0.74             | [20.8, 21] (47)           | 14.0 (47)       | 0.67             | (-) 0.52 (17)    |
| LIS 2                       | 36           | 0.74             | [26.7, 28] (10)           | 16.6 (10)       | 0.62             | (+) 0.58 (10)    |
| MCS                         | 21           | 0.63             | [13.1, 3] (45)            | 1.9 (45)        | 0.15             | (+) 0.11 (21)    |
|                             | 10           | 0.65             | [6.5, 6] (48)             | 3.6 (48)        | 0.55             |                  |
|                             | 10           | 0.65             | [6.5, 6] (48)             | 3.6 (48)        | 0.55             |                  |
| VS 1                        | 15           | 0.55             | [8.3, 0] (24)             | 1.8 (24)        | 0.22             | (+) 0.11 (17)    |
|                             | 15           | 0.42             | [6.3, 0] (58)             | 2.4 (58)        | 0.38             |                  |
|                             | 10           | 0.62             | [6.2, 1] (26)             | 2.6 (26)        | 0.42             |                  |
| VS 2                        | 28           | 0.42             | [11.7, 1] (55)            | 2.7 (55)        | 0.23             | (+) 0.14 (22)    |

1  
2  
3  
4  
5  
6  
7  
8  
9  
10  
11  
12  
13  
14  
15  
16  
17  
18  
19  
20  
21  
22  
23  
24  
25  
26  
27  
28  
29  
30  
31  
32  
33  
34  
35  
36  
37  
38  
39  
40  
41  
42  
43  
44  
45  
46  
47  
48  
49

|      |    |      |                |          |      |               |
|------|----|------|----------------|----------|------|---------------|
|      | 6  | 0.65 | [3.9, 3] (13)  | 2.9 (13) | 0.74 |               |
|      | 10 | 0.43 | [4.3, 0] (58)  | 3.0 (58) | 0.70 |               |
| VS 3 | 15 | 0.52 | [7.8, 0] (52)  | 1.7 (52) | 0.22 |               |
|      | 15 | 0.51 | [7.6, 0] (44)  | 4.8 (44) | 0.63 | (+) 0.07 (5)  |
|      | 15 | 0.51 | [7.6, 0] (44)  | 4.8 (44) | 0.63 |               |
| VS 4 | 15 | 0.57 | [8.5, 0] (53)  | 1.8 (53) | 0.21 |               |
|      | 6  | 0.42 | [2.5, 0] (45)  | 0.6 (45) | 0.24 | (-) 0.15 (15) |
|      | 15 | 0.57 | [8.5, 0] (53)  | 1.8 (53) | 0.21 |               |
| VS 5 | 15 | 0.69 | [10.4, 6] (56) | 3.5 (56) | 0.34 |               |
|      | 10 | 0.41 | [4.0, 1] (48)  | 2.5 (48) | 0.63 | (+) 0.19 (19) |
|      | 15 | 0.69 | [10.4, 6] (56) | 3.5 (56) | 0.34 |               |
| VS 6 | 15 | 0.60 | [9.0, 0] (9)   | 1.4 (9)  | 0.16 |               |
|      | 6  | 0.61 | [3.6, 0] (50)  | 1.1 (50) | 0.31 | (+) 0.33 (26) |
|      | 15 | 0.60 | [9.0, 0] (9)   | 1.4 (9)  | 0.16 |               |
| VS 7 | 21 | 0.61 | [12.9, 0] (45) | 2.5 (45) | 0.19 |               |
|      | 10 | 0.49 | [4.9, 0] (22)  | 2.8 (22) | 0.57 | (+) 0.33 (12) |

|                     |                  |                  |                           |                  |                  |                  |
|---------------------|------------------|------------------|---------------------------|------------------|------------------|------------------|
|                     | 15               | 0.48             | [7.2, 1] (48)             | 2.9 (48)         | 0.40             |                  |
| VS 8                | 15               | 0.61             | [ 9.1, 3] (56)            | 3.3 (56)         | 0.36             | (-) 0.13 (26)    |
| <b>VS</b>           | <b>17±5</b>      | <b>0.57±0.08</b> | <b>[9.7±1.8, 1±2]</b>     | <b>2.3±0.8</b>   | <b>0.24±0.07</b> |                  |
| <b>Average ± SD</b> | <b>10±4</b>      | <b>0.52±0.10</b> | <b>[5.2±2.2, 1±1]</b>     | <b>2.6±1.3</b>   | <b>0.48±0.18</b> | <b>0.18±0.10</b> |
|                     | <b>14±2</b>      | <b>0.56±0.08</b> | <b>[7.8±1.9, 1±2]</b>     | <b>2.9±1.0</b>   | <b>0.40±0.19</b> |                  |
| <b>CTR vs. VS</b>   | <b>&lt;0.001</b> | <b>0.004</b>     | <b>[0.002, 0.002]</b>     | <b>&lt;0.001</b> | <b>&lt;0.001</b> |                  |
| <b>P value</b>      | <b>&lt;0.001</b> | <b>&lt;0.001</b> | <b>[&lt;0.001, 0.002]</b> | <b>&lt;0.001</b> | <b>0.03</b>      | <b>&lt;0.001</b> |
|                     | <b>&lt;0.001</b> | <b>0.003</b>     | <b>[&lt;0.001, 0.002]</b> | <b>&lt;0.001</b> | <b>0.005</b>     |                  |

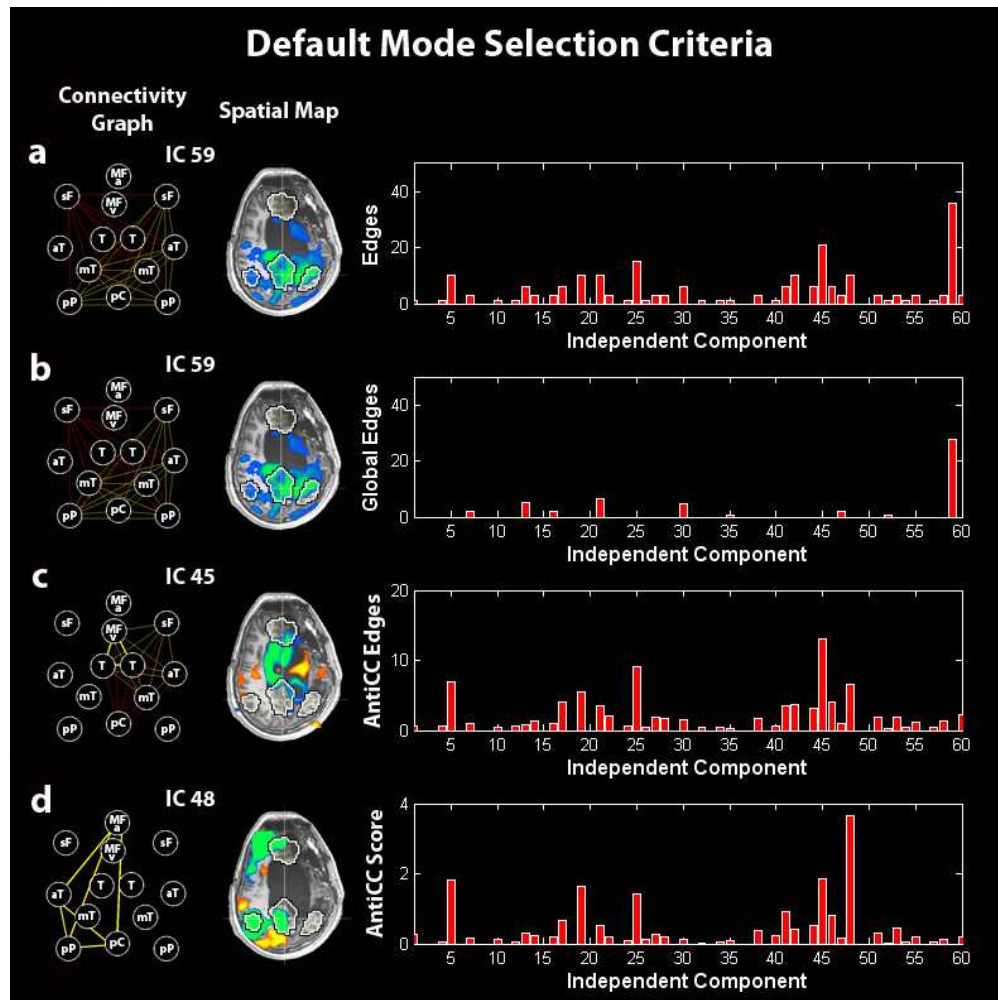

Illustration of the Default Mode selection method in a minimally conscious state patient. a) Selection of the IC corresponding to the graph with the highest number of edges. b) Selection of the IC corresponding to the graph with the highest number of global edges (to select the global signal IC). c) Selection of the IC corresponding to the graph with the highest number of anticorrelation-corrected edges. d) Selection of the IC corresponding to the graph with the highest anticorrelation-corrected score. Right panel: a) number of edges, b) number of global edges, c) number of anticorrelation-corrected edges and d) anticorrelation-corrected score of each graph vs. the corresponding IC number. Middle panel: spatial map of the selected IC. Left panel: connectivity graph of the selected IC. MFv=medial prefrontal cortex ventral, MFa=medial prefrontal cortex anterior, pC=posterior cingulate/precuneus, pP=posterior parietal lobe, sF=superior frontal gyrus, aT=middle temporal gyrus anterior, mT=parahippocampal/mesiotemporal, T=thalamus. Left is right side of brain.

279x279mm (72 x 72 DPI)

1  
2  
3  
4  
5  
6  
7  
8  
9  
10  
11  
12  
13  
14  
15  
16  
17  
18  
19  
20  
21  
22  
23  
24  
25  
26  
27  
28  
29  
30  
31  
32  
33  
34  
35  
36  
37  
38  
39  
40  
41  
42  
43  
44  
45  
46  
47  
48  
49  
50  
51  
52  
53  
54  
55  
56  
57  
58  
59  
60

2<sup>nd</sup> selection criterion

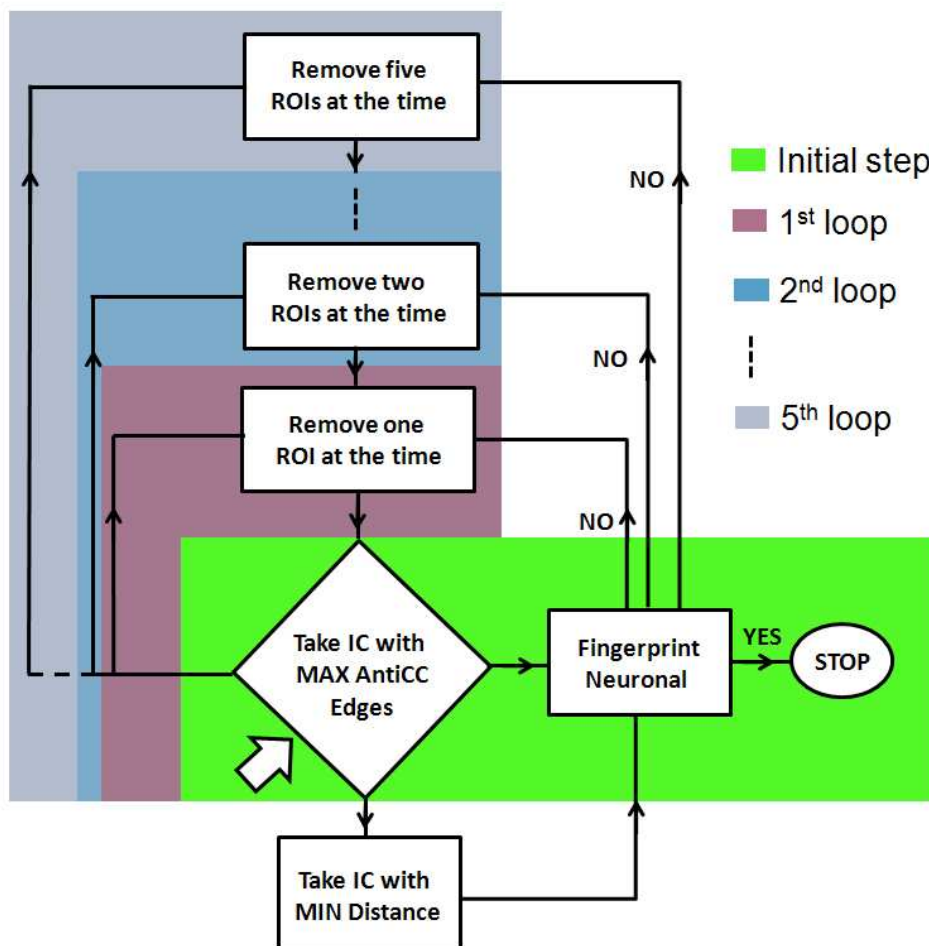

Flow chart illustrating the second selection criterion. Arrow indicates the starting point in the flow chart. Different color boxes indicate the different steps.  
279x304mm (72 x 72 DPI)

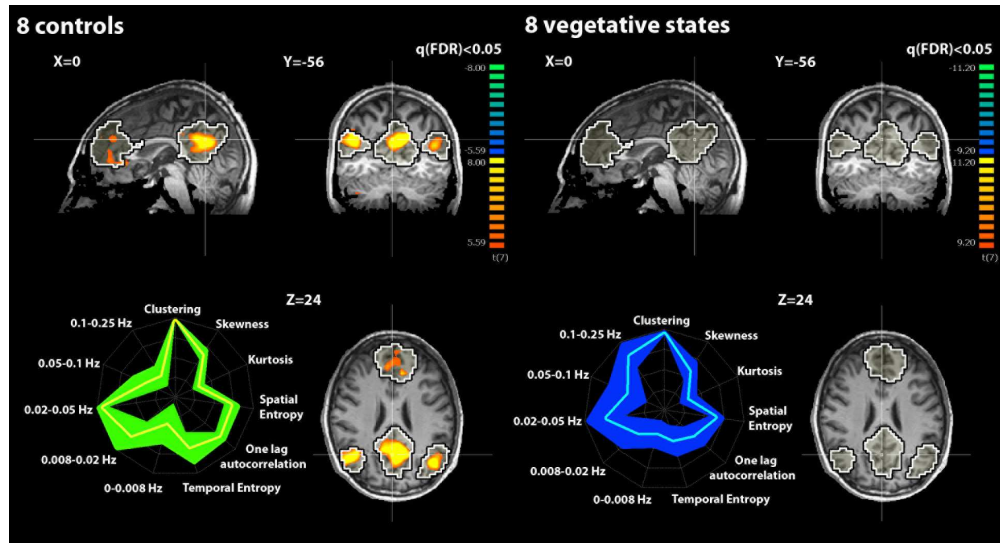

Upper part: Random effect group analyses identifying the Default Mode network (DMN) in 8 healthy controls and 8 patients in a vegetative state (VS). Results are thresholded at false discovery rate corrected  $p < 0.05$  with a mask given by the black and white contour regions showing the DMN from an independent dataset ( $n=11$  healthy controls, group 1). Lower part: Graphical representation (i.e., fingerprint; normalized values) of DMN temporal properties (5 frequency bands, temporal entropy and one-lag autocorrelation) and spatial properties (spatial entropy, skewness, kurtosis and clustering) in healthy controls (mean (yellow) and SD (green)) and in VS patients (mean (cyan) and SD (blue)).

685x370mm (72 x 72 DPI)



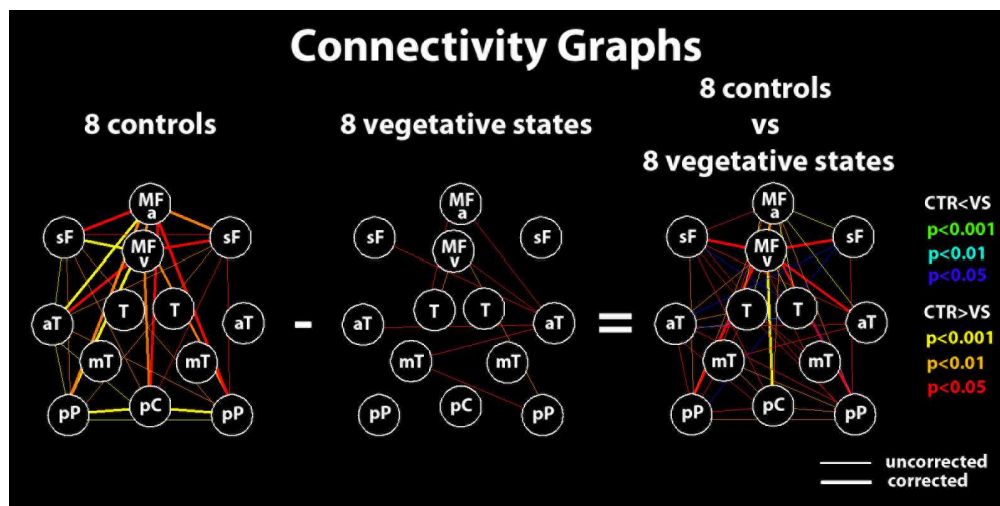

Connectivity graphs for the 8 healthy controls and the 8 VS patients' groups and between-group differences. Red (blue), orange (cyan) and yellow (green) lines represent  $p=0.05$ ,  $p=0.01$  and  $p=0.001$  respectively for positive and negative differences. Thicker lines are connections surviving correction for multiple comparisons. Nodes are defined as for figure 1.

558x279mm (72 x 72 DPI)

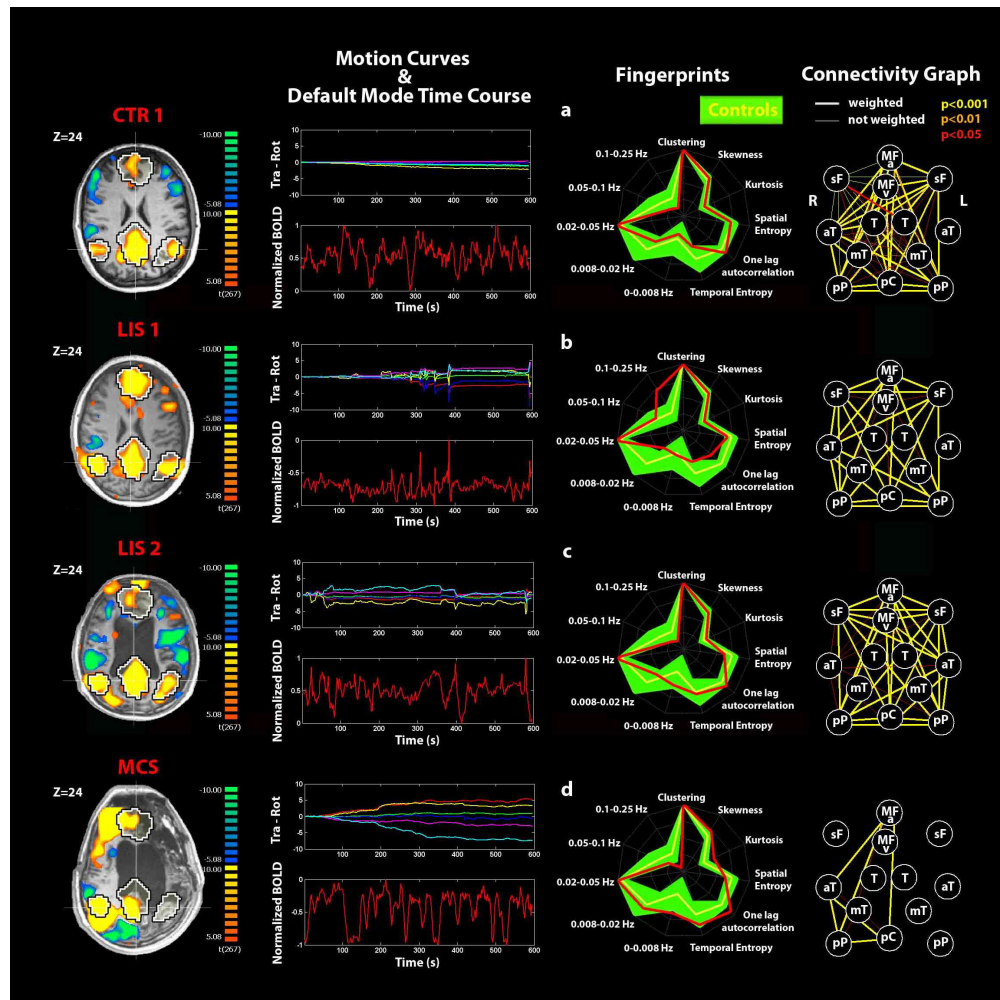

Single subject analyses identifying the default mode network (DMN) and connectivity graphs in (a) a representative healthy control, (b-c) LIS patients 1-2, (d) MCS patient. Positive correlations (yellow) and anti-correlations (blue) with the DMN time course shown on a transverse section at  $Z=24$  mm (thresholded at corrected  $p < 0.05$ ). Black and white contour regions show the DMN from an independent dataset of 11 healthy controls. Motion curves illustrate translation (in mm) for x (red), y (green) and z (blue) and rotation (in  $^{\circ}$ ) for pitch (yellow), roll (purple) and yaw (cyan) parameters, and the DMN time course illustrates the normalized BOLD signal over 600s. The fingerprint summarizes the DMN temporal and spatial properties for each subject (red) superimposed to the control data of 8 healthy subjects (mean in yellow and standard deviation in green). The connectivity graph illustrates the connections between the 13 selected DMN nodes at different thresholds for significance (thick lines "weighted edges" are corrected for external network anti-correlations). Nodes are defined as for figure 1.

812x812mm (72 x 72 DPI)

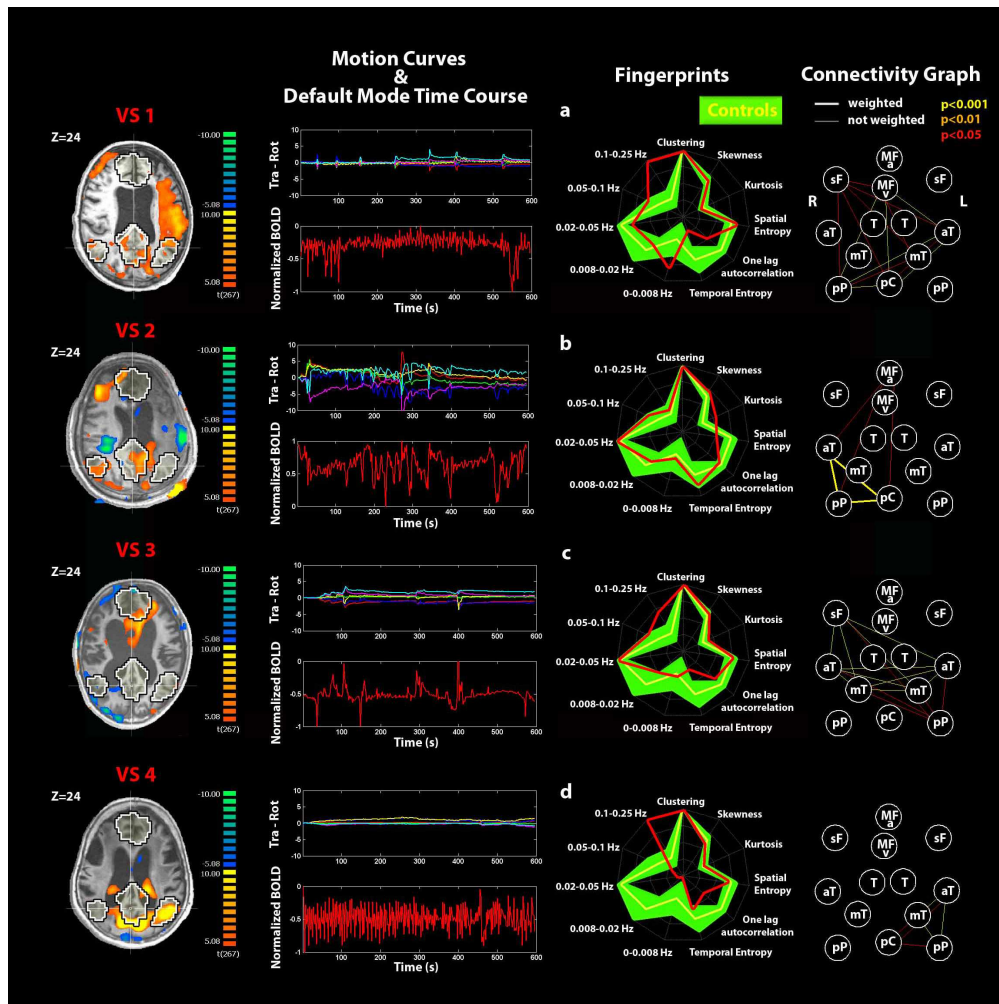

Single subject analyses identifying the Default Mode network (DMN) and connectivity graphs in (a-d) VS patients 1-4. See figure 5 for explanatory legend.  
812x812mm (72 x 72 DPI)

1  
2  
3  
4  
5  
6  
7  
8  
9  
10  
11  
12  
13  
14  
15  
16  
17  
18  
19  
20  
21  
22  
23  
24  
25  
26  
27  
28  
29  
30  
31  
32  
33  
34  
35  
36  
37  
38  
39  
40  
41  
42  
43  
44  
45  
46  
47  
48  
49  
50  
51  
52  
53  
54  
55  
56  
57  
58  
59  
60

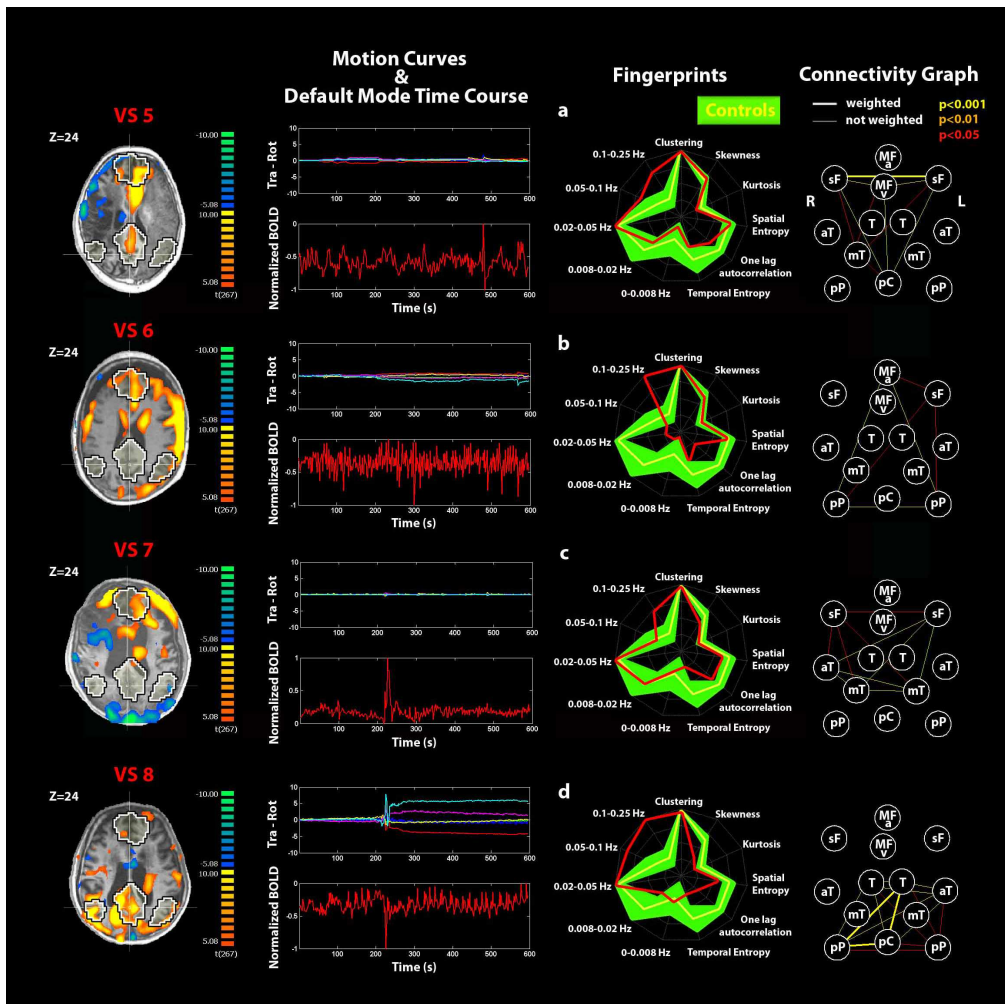

Single subject analyses identifying the Default Mode network (DMN) and connectivity graphs in (a-d) VS patients 5-8. See figure 5 for explanatory legend. 812x812mm (72 x 72 DPI)
